# Supplementary material for: Development and validation of a prognostic nomogram for myocardial infarction patients in intensive care units: a retrospective cohort study
Source: PubMed Central journal article supplement — BMJ Open. 2020 Dec 17;10(12):e040291. doi: 10.1136/bmjopen-2020-040291 (PMC7747593; doi:10.1136/bmjopen-2020-040291), 2020-12-17
Supplement: bmjopen-2020-040291.draft_revisions.pdf [file bmjopen-2020-040291.draft_revisions.pdf]

# BMJ Open

BMJ Open is committed to open peer review. As part of this commitment we make the peer review history of every article we publish publicly available.

When an article is published we post the peer reviewers' comments and the authors' responses online. We also post the versions of the paper that were used during peer review. These are the versions that the peer review comments apply to.

The versions of the paper that follow are the versions that were submitted during the peer review process. They are not the versions of record or the final published versions. They should not be cited or distributed as the published version of this manuscript.

BMJ Open is an open access journal and the full, final, typeset and author-corrected version of record of the manuscript is available on our site with no access controls, subscription charges or pay-per-view fees (<http://bmjopen.bmj.com>).

If you have any questions on BMJ Open's open peer review process please email [info.bmjopen@bmj.com](mailto:info.bmjopen@bmj.com)

# BMJ Open

## Development and validation of a prognostic nomogram for myocardial infarction patients in intensive care units: a retrospective cohort study

|                               |                                                                                                                                                                                                                                                                                                                                                                                                                                                                                                                                                                                                                                                                                                                                                                                                                                                                                          |
|-------------------------------|------------------------------------------------------------------------------------------------------------------------------------------------------------------------------------------------------------------------------------------------------------------------------------------------------------------------------------------------------------------------------------------------------------------------------------------------------------------------------------------------------------------------------------------------------------------------------------------------------------------------------------------------------------------------------------------------------------------------------------------------------------------------------------------------------------------------------------------------------------------------------------------|
| Journal:                      | <i>BMJ Open</i>                                                                                                                                                                                                                                                                                                                                                                                                                                                                                                                                                                                                                                                                                                                                                                                                                                                                          |
| Manuscript ID                 | bmjopen-2020-040291                                                                                                                                                                                                                                                                                                                                                                                                                                                                                                                                                                                                                                                                                                                                                                                                                                                                      |
| Article Type:                 | Original research                                                                                                                                                                                                                                                                                                                                                                                                                                                                                                                                                                                                                                                                                                                                                                                                                                                                        |
| Date Submitted by the Author: | 12-May-2020                                                                                                                                                                                                                                                                                                                                                                                                                                                                                                                                                                                                                                                                                                                                                                                                                                                                              |
| Complete List of Authors:     | Guo, Qi; Sun Yat-Sen University Sun Yat-Sen Memorial Hospital, Department of Cardiology<br>Wu, Maoxiong; Sun Yat-Sen University Sun Yat-Sen Memorial Hospital, Department of Cardiology<br>Li, Hongwei; Sun Yat-Sen University Sun Yat-Sen Memorial Hospital, Department of Cardiology<br>Ouyang, Huijun; Sun Yat-Sen University Sun Yat-Sen Memorial Hospital, Department of Cardiology<br>Sun, Runlu; Sun Yat-Sen University Sun Yat-Sen Memorial Hospital, Department of Cardiology<br>Wang, Junjie; Sun Yat-Sen University Sun Yat-Sen Memorial Hospital, Department of Cardiology<br>Liu, Zhaoyu; Sun Yat-Sen University Sun Yat-Sen Memorial Hospital, Department of Cardiology<br>Wang, Jingfeng; Sun Yat-Sen University Sun Yat-Sen Memorial Hospital, Department of Cardiology<br>Zhang, Yuling; Sun Yat-Sen University Sun Yat-Sen Memorial Hospital, Department of Cardiology |
| Keywords:                     | Myocardial infarction < CARDIOLOGY, INTENSIVE & CRITICAL CARE, Risk management < HEALTH SERVICES ADMINISTRATION & MANAGEMENT                                                                                                                                                                                                                                                                                                                                                                                                                                                                                                                                                                                                                                                                                                                                                             |
|                               |                                                                                                                                                                                                                                                                                                                                                                                                                                                                                                                                                                                                                                                                                                                                                                                                                                                                                          |

SCHOLARONE™  
Manuscripts

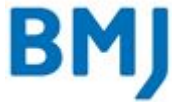

I, the Submitting Author has the right to grant and does grant on behalf of all authors of the Work (as defined in the below author licence), an exclusive licence and/or a non-exclusive licence for contributions from authors who are: i) UK Crown employees; ii) where BMJ has agreed a CC-BY licence shall apply, and/or iii) in accordance with the terms applicable for US Federal Government officers or employees acting as part of their official duties; on a worldwide, perpetual, irrevocable, royalty-free basis to BMJ Publishing Group Ltd ("BMJ") its licensees and where the relevant Journal is co-owned by BMJ to the co-owners of the Journal, to publish the Work in this journal and any other BMJ products and to exploit all rights, as set out in our [licence](#).

The Submitting Author accepts and understands that any supply made under these terms is made by BMJ to the Submitting Author unless you are acting as an employee on behalf of your employer or a postgraduate student of an affiliated institution which is paying any applicable article publishing charge ("APC") for Open Access articles. Where the Submitting Author wishes to make the Work available on an Open Access basis (and intends to pay the relevant APC), the terms of reuse of such Open Access shall be governed by a Creative Commons licence – details of these licences and which [Creative Commons](#) licence will apply to this Work are set out in our licence referred to above.

Other than as permitted in any relevant BMJ Author's Self Archiving Policies, I confirm this Work has not been accepted for publication elsewhere, is not being considered for publication elsewhere and does not duplicate material already published. I confirm all authors consent to publication of this Work and authorise the granting of this licence.

1  
2  
3  
4 **Development and validation of a prognostic nomogram for myocardial infarction**  
5  
6 **patients in intensive care units: a retrospective cohort study**  
7

8  
9 Qi Guo,<sup>1,2</sup> Maoxiong Wu,<sup>1,2</sup> Hongwei Li,<sup>1,2</sup> Huijun Ouyang,<sup>1,2</sup> Runlu Sun,<sup>1,2</sup> Junjie  
10  
11 Wang,<sup>1,2</sup> Zhaoyu Liu,<sup>1,2</sup> Jingfeng Wang,<sup>1,2</sup> Yuling Zhang<sup>1,2</sup>  
12

13  
14 <sup>1</sup>Department of Cardiology, Sun Yat-sen Memorial Hospital of Sun Yat-sen University,  
15  
16 Guangzhou, China  
17

18  
19 <sup>2</sup>Guangdong Province Key Laboratory of Arrhythmia and Electrophysiology,  
20  
21 Guangzhou, China  
22  
23

24  
25  
26  
27 **Corresponding author at:** Department of Cardiology, Sun Yat-sen Memorial Hospital  
28  
29 of Sun Yat-sen University, No. 107 West Yanjiang Road, Guangzhou, 510120, China.

30  
31 E-mail address: [zzhangyuling@126.com](mailto:zzhangyuling@126.com) (Yuling Zhang)  
32

33  
34  
35 Tel: 86-20-81332360  
36

37  
38 Fax: 86-20-81332360  
39

40  
41 Dr Qi Guo and Dr Maoxiong Wu contributed equally to this work.  
42

43 **Word count:** 2778  
44  
45  
46  
47  
48  
49  
50  
51  
52  
53  
54  
55  
56  
57  
58  
59  
60

## ABSTRACT

**Objectives:** We aimed to develop and validate a prognostic nomogram in order to improve the prediction of 30-day survival of critically ill myocardial infarction (MI) patients.

**Design:** A retrospective cohort study.

**Setting:** Data were collected from the Medical Information Mart for Intensive Care (MIMIC)-III database, consisting of critically ill participants between 2001 and 2012 in the United States.

**Participants:** A total of 2031 adult critically ill patients with MI were enrolled from the MIMIC-III database.

**Primary and secondary outcome:** Thirty-day survival.

**Results:** Independent prognostic factors, including age, heart rate, white blood cell count, blood urea nitrogen, and bicarbonate, were identified by Cox regression model and used in the nomogram. Good agreement between the prediction and observation was indicated by the calibration curve for 30-day survival. The nomogram exhibited excellent discrimination [area under the receiver operating characteristic curve, 0.765, 95% (confidence interval) CI, 0.716-0.814] and calibration (C-index, 0.758, 95% CI, 0.712-0.804) in the validation cohort. Decision curve analysis demonstrated that the nomogram was clinically beneficial. Additionally, participants could be classified into two risk groups by the nomogram, and the 30-day survival probability was significantly different between them ( $P < 0.001$ ).

**Conclusions:** This five-factor nomogram can accurately predict 30-day survival in

1  
2  
3  
4 critically ill MI patients and might be helpful for risk stratification and decision making  
5  
6 for MI patients.  
7

8  
9 **Keywords:** myocardial infarction; 30-day survival; intensive care unit; nomogram;  
10  
11 prognostic model  
12

### 13 14 **Article Summary**

#### 15 16 **Strengths and limitations of this study**

17  
18 This is the first study to develop and validate a prognostic nomogram for Myocardial  
19  
20 infarction (MI) patients in the intensive care unit (ICU).  
21  
22

23  
24 This novel nomogram showed satisfactory performance in both the primary cohort and  
25  
26 validation cohort as assessed by the area under the receiver operating characteristic  
27  
28 curve, calibration curves, decision curve analysis and survival curves.  
29  
30

31  
32 The prognostic nomogram developed by our study with five factors, including age,  
33  
34 heart rate, white blood cell count, blood urea nitrogen level, and bicarbonate level,  
35  
36 could be easily employed for risk stratification and decision making for MI patients  
37  
38 undergoing clinical treatment.  
39  
40

41  
42 Brain natriuretic peptide and troponin were not included in our analysis due to missing  
43  
44 value.  
45  
46  
47  
48  
49  
50  
51  
52  
53  
54  
55  
56  
57  
58  
59  
60

## Introduction

Myocardial infarction (MI) is a major health problem that causes high mortality and high economic costs worldwide.<sup>1</sup> A substantial proportion of MI patients are admitted to the intensive care unit (ICU).<sup>2</sup> However, not all MI patients benefit from ICU care.<sup>3</sup> It is necessary to perform risk stratification for MI to help clinicians make more efficient decisions, which provides benefits for more MI patients.

Nomograms are popular prognostic tools with the ability to predict clinical events by integrating potential risk factors.<sup>4</sup> Nomograms have been widely used for tumor prognosis, supporting the movement towards personalized oncology medicine.<sup>5</sup> Recently, a nomogram was effectively used to predict both short-term and long-term survival for asymptomatic adults undergoing screening for cardiac risk factors.<sup>6</sup> Thus, we hypothesized that a nomogram may also be feasible for the risk stratification of critically ill MI patients.

This study aimed to identify prognostic factors for the 30-day mortality of critically ill MI patients and establish a prognostic nomogram based on a multivariate Cox regression model in a primary cohort. Furthermore, the performance, discrimination capacity and clinical benefits of the nomogram were assessed in a validation cohort to validate the accuracy and utility of the prognostic nomogram model. The nomogram could be easily applied in clinical practice to identify high-risk patients and guide decision making.

## Methods

### Data source

1  
2  
3  
4 The data were retrieved from the Medical Information Mart for Intensive Care  
5  
6 (MIMIC-III) dataset. The MIMIC-III integrates the comprehensive clinical data of  
7  
8 53,423 stays of adult patients in the ICU between 2001 and 2012. An average of 4,597  
9  
10 charted observations and 380 laboratory measurements are available for individual  
11  
12 hospital admissions. The overall information is saved as a relational database,  
13  
14 consisting of patient demographics, laboratory tests, discharge summaries,  
15  
16 electrocardiographs, imaging examinations, diagnostic information such as the  
17  
18 International Classification of Disease (ICD)-9 code, and in-hospital and out-of-  
19  
20 hospital mortality. The use of MIMIC-III database was under the approval from the  
21  
22 review boards of the Massachusetts Institute of Technology and Beth Israel Deaconess  
23  
24 Medical Center.<sup>7</sup> All the patients in the database have been deidentified for privacy,  
25  
26 and the need for informed consent was waived. This study was conducted in accordance  
27  
28 with the recommendations of the Transparent Reporting of a multivariable prediction  
29  
30 model for Individual Prognosis Or Diagnosis (TRIPOD) statement.<sup>8</sup>  
31  
32  
33  
34  
35  
36  
37  
38  
39

#### 40 **Study cohort**

41  
42 Patients admitted to the ICU who were diagnosed with MI were eligible for inclusion.  
43  
44 After screening of the MIMIC-III database, a total of 2,031 patients with MI were  
45  
46 included for analysis. The cohort was randomly divided into the primary cohort and the  
47  
48 validation cohort in a ratio of 7:3; the primary cohort was used to establish the  
49  
50 nomogram, and the validation cohort was used for validation.  
51  
52  
53  
54

#### 55 **Data extraction**

56  
57  
58 Structure Query Language was used for data extraction. For patients with multiple ICU  
59  
60



admissions, only the data of the patient's first ICU admission were used in this study.

All data regarding baseline characteristics were collected in the initial 24 hours following admission. The variables for the following analysis included (1) basic demographics, including age, sex, weight, coronary care unit stay and private insurance; (2) vital signs, including heart rate, mean arterial pressure (MAP), temperature and central venous pressure (CVP); and (3) laboratory tests, including tests of white blood cell count (WBC), hemoglobin, platelets, serum creatinine, creatinine kinase, type B natriuretic peptide (BNP), blood urea nitrogen (BUN) level, bicarbonate level, pH, partial pressure of oxygen (pO<sub>2</sub>), partial pressure of carbon dioxide (pCO<sub>2</sub>), chloride, sodium, potassium, troponin and lactate.

In this study, we regarded 30-day survival as the outcome measure, which was also extracted from the MIMIC-III database.

### **Management of missing data**

Variables with missing data are common in the MIMIC-III database. More than 20% of the data regarding CVP, pCO<sub>2</sub>, pO<sub>2</sub>, pH, BNP, troponin, and lactate were missing, and these parameters were not qualified for establishment of the nomogram (Supplementary Figure 1). A flag indicating whether these data were obtained is shown in the characteristics table. For variables that had missing data for less than 20% of patients, missing values were filled with predictors using multiple imputation to minimize the bias resulting from missing values.<sup>9</sup>

### **Statistical analysis**

Continuous variables are expressed as the mean  $\pm$  standard deviation or median

1  
2  
3  
4 (interquartile range, IQR), as appropriate. Categorical data are expressed as numbers  
5  
6 (percentages). Continuous variables were compared using Student's *t* test or the rank-  
7  
8 sum test, as appropriate. Categorical variables were compared by the chi-squared test.  
9  
10 Univariate Cox regression was used to screen for variables that were significantly  
11  
12 associated with 30-day survival in the primary cohort. Potential prognostic factors that  
13  
14 were significant in the univariate Cox regression model were entered into the  
15  
16 multivariable Cox proportional hazard model, in which the hazard ratio (HR) was also  
17  
18 calculated. The backward stepwise process based on the Akaike information criterion  
19  
20 was used to control the overfitting of the model.  
21  
22  
23  
24  
25

26  
27 A nomogram based on the results of previous multivariable analyses was constructed.  
28  
29 The calibration, discrimination and clinical usefulness of the nomogram were  
30  
31 calculated to evaluate its performance.<sup>10</sup> The area under the receiver operating  
32  
33 characteristic curve (AUC) and Harrell's concordance index (C-index) were used to  
34  
35 assess the predictive capacity of the prediction model. Confidence intervals (CIs) were  
36  
37 obtained by creating 1000 bootstrap samples from the corresponding cohort and  
38  
39 replicating the estimation process. The calibration curve was used to analyze the  
40  
41 agreement between the nomogram and actual observation. Decision curve analysis was  
42  
43 performed to assess the clinical usefulness of the prognostic nomogram by quantifying  
44  
45 the standardized net benefits at different threshold probabilities. Survival curves were  
46  
47 used to compare the survival probability between the low-risk group and the high-risk  
48  
49 group defined by the nomogram.  
50  
51  
52  
53  
54  
55  
56

57  
58 A two-tailed *P* value < 0.05 was considered statistically significant in our study. SPSS  
59  
60

software (version 23.0, IBM, NY, USA) and R software (version 3.6.3, R Foundation for Statistical Computing, Vienna, Austria) were used for statistical analysis.

### **Patient and Public Involvement**

Patients and/or the public were not directly involved in this study.

### **Results**

#### **Baseline characteristics of the primary cohort and validation cohort**

The primary cohort and validation cohort consisted of 1,422 and 609 MI patients, respectively. In the primary cohort, the mean age was  $67.6 \pm 14.2$  years. The mean heart rate, WBC, BUN level, and bicarbonate level were  $84.8 \pm 17.9$  beats per minute (bpm),  $12.6 \pm 5.6$  K/ $\mu$ L, 18.0 (IQR: 13.8-27.0) mg/dL and  $22.9 \pm 4.1$  mg/dL, respectively. The 30-day mortality was 14.6% (208/1422). Regarding the validation cohort, the mean age was  $68.5 \pm 14.1$  years. The mean heart rate, WBC, BUN level, and bicarbonate level were  $84.7 \pm 17.1$  bpm,  $12.7 \pm 5.5$  K/ $\mu$ L, 19.7 (IQR: 14.0-28.0) mg/dL and  $23.1 \pm 3.9$  mg/dL, respectively. The 30-day mortality was 15.6% (95/609). There were no significant differences in the baseline characteristics between the primary cohort and validation cohort (all  $P > 0.05$ ) (Table 1).

#### **Prognostic factors in the primary cohort**

Basic demographics, vital signs, and laboratory tests in the primary cohort were further examined by the univariate Cox regression model for the prediction of 30-day mortality (Supplementary Table 1). Variables including age, male sex, weight, private insurance, heart rate, MAP, hemoglobin WBC, BUN level, bicarbonate level, creatinine level, and potassium level were potential predictors of 30-day mortality in the univariate analysis

1  
2  
3  
4 ( $P < 0.05$ ). All these candidate factors were entered into the multiple Cox proportional  
5  
6 hazard model, and five prognostic factors, namely, age, heart rate, WBC, BUN level  
7  
8 and bicarbonate level, were included in the final prediction model (each  $P < 0.05$ )  
9  
10  
11 (Table 2).

### 12 13 14 **A prognostic nomogram for 30-day survival**

15  
16  
17 A prognostic nomogram for 30-day survival was established with the five prognostic  
18  
19 factors obtained from the multiple Cox proportional hazard model (Figure 1). The  
20  
21 nomogram was generated by assigning a weighted score to each of the independent  
22  
23 prognostic parameters. The scales of age, heart rate, WBC, BUN level, and bicarbonate  
24  
25 level ranged from 10 to 100, 30 to 150, 0 to 75, 0 to 160, and 40 to 5, respectively. The  
26  
27 highest total score was 300 points, and the scale of the 30-day survival probability  
28  
29 ranged from 0.95 to 0.1. A higher score calculated from the sum of the assigned points  
30  
31 for each prognostic factor in the nomogram corresponded to a lower probability of  
32  
33 survival in 30 days. For instance, one MI patient with an age of 70 years old (57 points),  
34  
35 a heart rate of 110 bpm (33 points), a WBC of 11 K/ $\mu$ L (10 points), a BUN level of 80  
36  
37 mg/dL (33 points) and a bicarbonate level of 10 mg/dL (85 points) had a total score of  
38  
39 218 points, which corresponded to an approximately 30% 30-day survival probability.

### 40 41 42 **Performance evaluation of the prognostic nomogram**

43  
44  
45 The AUC indicated that the predictive capacity of the prediction model was 0.803 (95%  
46  
47 CI, 0.771-0.835) in the primary cohort and 0.765 (95% CI, 0.716-0.814) in the  
48  
49 validation cohort (Figure 2A, B). The C-index was 0.787 (95% CI, 0.757-0.817) for the  
50  
51 primary cohort and 0.758 (95% CI, 0.712-0.804) for the validation cohort. The  
52  
53  
54  
55  
56  
57  
58  
59  
60

1  
2  
3  
4 calibration plot demonstrated adequate fit of the nomogram for predicting 30-day  
5  
6 survival, which was consistent with the Kaplan-Meier estimate in both the primary  
7  
8 cohort and validation cohort (Figure 2C, D). The decision curve analysis showed the  
9  
10 net benefits obtained from the application of our nomogram with threshold probabilities  
11  
12 of 0.648 and 0.499 in the primary cohort and validation cohort, respectively (Figure 2E,  
13  
14 F). Participants could be classified into low-risk and high-risk groups by the nomogram.  
15  
16 Survival curves revealed a significantly lower survival probability in the high-risk  
17  
18 group than in the low-risk group in both the primary cohort and validation cohort  
19  
20 ( $P<0.001$ ), which indicated the substantial discriminatory power of the nomogram to  
21  
22 distinguish low-risk and high-risk MI patients in the ICU.  
23  
24  
25  
26  
27  
28

### 30 **Discussion**

31  
32 This study extracted clinical data and survival information of 2,031 MI patients from  
33  
34 the MIMIC-III database. Five risk factors for 30-day mortality of MI, including age,  
35  
36 heart rate, WBC, BUN level, and bicarbonate level, were identified by univariate and  
37  
38 multivariate Cox regression models and used to establish a prognostic nomogram. To  
39  
40 the best of our knowledge, this is the first study to develop and validate a prognostic  
41  
42 nomogram for MI patients in the ICU. This novel nomogram showed satisfactory  
43  
44 performance in both the primary cohort and validation cohort as assessed by the AUC,  
45  
46 calibration curves, decision curve analysis and survival curves. Thus, this nomogram  
47  
48 could be efficiently and effectively employed in clinical practice.  
49  
50  
51  
52  
53  
54

55  
56 MI has been a global health problem with a high incidence and a high mortality, and it  
57  
58 has led to economic and health burdens in patients.<sup>1</sup> The Thrombolysis in Myocardial  
59  
60

1  
2  
3  
4 Infarction (TIMI) score and the Global Registry of Acute Coronary Events (GRACE)  
5  
6 score are two common tools to predict short-term and long-term outcomes for acute MI  
7  
8 patients.<sup>11-13</sup> Both the TIMI risk score and the GRACE score require more than five  
9  
10 factors to calculate the probability of mortality. In addition, the Soroka Acute  
11  
12 Myocardial Infarction (SAMI) risk score, which was used to predict 1-year and 5-year  
13  
14 mortality of acute MI in Israel, consists of 10 risk factors.<sup>14</sup> Our nomogram uses five  
15  
16 factors that can be collected at first-day admission, can be easily applied, and performs  
17  
18 well in predicting short-term mortality of patients with MI. We hope that this short  
19  
20 nomogram will be used for the quick identification of high-risk MI patients in the ICU.  
21  
22 Nomograms are of great utility in predicting an individual's probability of a clinical  
23  
24 event using individual variables, and they have become a common prognostic tool in  
25  
26 oncology.<sup>4</sup> A nomogram was developed for the 5- to 15-year survival of asymptomatic  
27  
28 adults undergoing coronary artery calcium scoring.<sup>6</sup> For the mortality of MI, our study  
29  
30 is the first to provide a simple-to-use prognostic nomogram with five factors that are  
31  
32 easily accessible on the first-day admission, and this nomogram might improve timely  
33  
34 individualized risk stratification and the prevention of fatal outcomes. The satisfactory  
35  
36 performance of this model was reflected by its moderate predictive ability, indicated by  
37  
38 an AUC greater than 0.75 in both the primary cohort and validation cohort. Additionally,  
39  
40 the calibration analysis performed in two cohorts revealed that the predicted 30-day  
41  
42 mortality was similar to the actual 30-day mortality. Furthermore, decision curve  
43  
44 analysis indicated that the net clinical benefits were positive in MI patients, with a  
45  
46 probability of up to 50% in both cohorts. The survival curves also revealed the good  
47  
48  
49  
50  
51  
52  
53  
54  
55  
56  
57  
58  
59  
60

1  
2  
3  
4 discriminative capacity to identify high-risk and low-risk patients in both the primary  
5  
6 cohort and validation cohort.  
7

8  
9 It should be noted that only five prognostic factors were used in the final nomogram  
10  
11 model. Age has been widely recognized as one of the most powerful risk factors in  
12  
13 cardiovascular diseases, such as vascular senescence, cardiac remodeling, and atrial  
14  
15 fibrillation.<sup>15-17</sup> Decreased expression of antioxidative factors and increased expression  
16  
17 of oxidative molecular mediators occur in elderly patients, leading to aggravating  
18  
19 ischemic injury.<sup>15,18</sup> Heart rate is also an important prognostic factor for cardiovascular  
20  
21 mortality. A higher resting heart rate was reported to be positively related to a higher  
22  
23 risk of MI and all-cause mortality.<sup>19,20</sup> These results were consistent with our study, in  
24  
25 which heart rate was positively associated with mortality of MI.  
26  
27  
28  
29  
30  
31

32 Among lab tests, WBC has also been shown to be a potential risk factor and to be  
33  
34 associated with myocardial perfusion and the severity of coronary artery disease.<sup>21,22</sup> A  
35  
36 recent cohort study of triple-vessel coronary artery disease revealed the independent  
37  
38 prognostic value of both total and differential white blood cell counts for predicting  
39  
40 long-term mortality.<sup>23</sup> BUN level has also been demonstrated to be independently  
41  
42 associated with mortality in patients with MI, even in patients with normal to mildly  
43  
44 reduced glomerular filtration rates.<sup>24,25</sup> Bicarbonate is a central biomarker that reflects  
45  
46 acid-base equilibrium and is affected by electrolyte disturbance. In this study,  
47  
48 bicarbonate level was negatively related to 30-day mortality, which was consistent with  
49  
50 another cohort study of cardiogenic shock patients hospitalized in the ICU.<sup>26</sup> In short,  
51  
52 these five factors included in the nomogram were all credible prognostic factors for  
53  
54  
55  
56  
57  
58  
59  
60

1  
2  
3  
4 cardiovascular mortality, and these factors could be used in clinical work.  
5

6  
7 One of the limitations of this study was that a few previously reported independent  
8  
9 predictors for major cardiovascular events, including BNP and troponin, were not  
10  
11 included to minimize the bias from excessive missing values.<sup>27,28</sup> Hence, the prognostic  
12  
13 value of these factors for MI could not be estimated. Another limitation was that the  
14  
15 model still required more samples to validate its viability. Although we performed  
16  
17 random allocation to establish a validation cohort with 30% of the total sample size for  
18  
19 the verification of the superiority of our model, a large external cohort would further  
20  
21 enhance the credibility and effectiveness of our model in future studies.  
22  
23  
24  
25

26  
27 In conclusion, our study developed a prognostic nomogram with five factors, including  
28  
29 age, heart rate, WBC, BUN level, and bicarbonate level, for the prediction of 30-day  
30  
31 survival in critically ill MI patients in the ICU. This nomogram performed well and  
32  
33 might be helpful in risk stratification and decision making for MI patients undergoing  
34  
35 clinical treatment.  
36  
37  
38  
39  
40  
41  
42  
43  
44  
45  
46  
47  
48  
49  
50  
51  
52  
53  
54  
55  
56  
57  
58  
59  
60



## Acknowledgments

We would like to thank the participants, developers and investigators associated with the Medical Information Mart for Intensive Care (MIMIC)-III database.

## Author contributions

**Qi Guo:** Conceptualization, data analysis, Writing-original draft, Writing-review&editing. **Maoxiong Wu:** Conceptualization, Writing-original draft, Writing-review&editing. **Hongwei Li:** Writing-original draft, Data curation. **Huijun Ouyang:** Literature search, Data interpretation. **Runlu Sun:** Data collection, Data curation. **Junjie Wang:** Data collection, Data curation. **Zhaoyu Liu:** Literature search, Data interpretation. **Jingfeng Wang:** Conceptualization, Writing-review&editing, Data curation. **Yuling Zhang:** Conceptualization, Writing-review&editing, Data curation.

## Funding Sources

This study was funded by grants from the National Natural Science Foundation of China (No. 81970388 and No. 81900387), Guangdong Basic and Applied Basic Research Found (No. 2019A1515011806) and Fundamental Research Funds for the Central Universities (No. 19ykpy97).

## Disclaimer

The funders had no roles in study design, data collection, data analysis, interpretation and writing of the report.

## Declaration of Interests

All authors declare no potential conflicts of interest.

## Data availability statement

1  
2  
3  
4 The dataset analyzed to generate the findings for this study are available from the  
5  
6 corresponding author on reasonable request.  
7  
8  
9  
10  
11  
12  
13  
14  
15  
16  
17  
18  
19  
20  
21  
22  
23  
24  
25  
26  
27  
28  
29  
30  
31  
32  
33  
34  
35  
36  
37  
38  
39  
40  
41  
42  
43  
44  
45  
46  
47  
48  
49  
50  
51  
52  
53  
54  
55  
56  
57  
58  
59  
60

For peer review only

## References

1. Virani SS, Alonso A, Benjamin EJ, et al. Heart Disease and Stroke Statistics-2020 Update: A Report From the American Heart Association. *Circulation* 2020; CIR00000000000000757.
2. Zhou L, Tao Z, Wu Y, et al. Individual and institutional factors affecting cardiac monitoring in coronary care units: a national survey of Chinese nurses. *Int J Nurs Stud* 2012; **49**(5): 570-8.
3. Valley TS, Iwashyna TJ, Cooke CR, et al. Intensive care use and mortality among patients with ST elevation myocardial infarction: retrospective cohort study. *BMJ* 2019; **365**: 11927.
4. Balachandran VP, Gonen M, Smith JJ, DeMatteo RP. Nomograms in oncology: more than meets the eye. *The Lancet Oncology* 2015; **16**(4): e173-e80.
5. Iasonos A, Schrag D, Raj GV, Panageas KS. How to build and interpret a nomogram for cancer prognosis. *J Clin Oncol* 2008; **26**(8): 1364-70.
6. B OH, Gransar H, Callister T, et al. Development and Validation of a Simple-to-Use Nomogram for Predicting 5-, 10-, and 15-Year Survival in Asymptomatic Adults Undergoing Coronary Artery Calcium Scoring. *JACC Cardiovasc Imaging* 2018; **11**(3): 450-8.
7. Johnson AEW, Pollard TJ, Shen L, et al. MIMIC-III, a freely accessible critical care database. *Sci Data* 2016; **3**: 160035.
8. Collins GS, Reitsma JB, Altman DG, Moons KG. Transparent reporting of a multivariable prediction model for individual prognosis or diagnosis (TRIPOD): the

1  
2  
3  
4 TRIPOD statement. *BMJ* 2015; **350**: g7594.  
5

6  
7 9. Zhang Z. Multiple imputation with multivariate imputation by chained equation  
8  
9 (MICE) package. *Ann Transl Med* 2016; **4**(2): 30.  
10

11  
12 10. Alba AC, Agoritsas T, Walsh M, et al. Discrimination and Calibration of Clinical  
13  
14 Prediction Models: Users' Guides to the Medical Literature. *Jama* 2017; **318**(14): 1377-  
15  
16 84.  
17

18  
19 11. Antman EM CM, Bernink PJ, McCabe CH, Horacek T, Papuchis G, Mautner B,  
20  
21 Corbalan R, Radley D, Braunwald E. The TIMI risk score for unstable angina/non-ST  
22  
23 Elevation MI: a method for prognostication and therapeutic decision making. *Jama*  
24  
25 2000; **284**(7): 835-42.  
26  
27

28  
29 12. Morrow DA, Antman EM, Charlesworth A, et al. TIMI risk score for ST-elevation  
30  
31 myocardial infarction: A convenient, bedside, clinical score for risk assessment at  
32  
33 presentation: An intravenous nPA for treatment of infarcting myocardium early II trial  
34  
35 substudy. *Circulation* 2000; **102**(17): 2031-7.  
36  
37

38  
39 13. Granger CB GR, Dabbous O, Pieper KS, Eagle KA, Cannon CP, Van De Werf F,  
40  
41 Avezum A, Goodman SG, Flather MD, Fox KAA, Global Registry of Acute Coronary  
42  
43 Events Investigators. Predictors of hospital mortality in the global registry of acute  
44  
45 coronary events. *Archives of internal medicine* 2003; **163**(19): 2345-53.  
46  
47

48  
49 14. Plakht Y, Shiyovich A, Weitzman S, Fraser D, Zahger D, Gilutz H. A new risk  
50  
51 score predicting 1- and 5-year mortality following acute myocardial infarction Soroka  
52  
53 Acute Myocardial Infarction (SAMI) Project. *International journal of cardiology* 2012;  
54  
55 **154**(2): 173-9.  
56  
57  
58  
59  
60

- 1  
2  
3  
4 15. Salazar G. NADPH Oxidases and Mitochondria in Vascular Senescence. *Int J Mol*  
5  
6  
7 *Sci* 2018; **19**(5).  
8
- 9 16. Dhalla NS, Rangi S, Babick AP, Zieroth S, Elimban V. Cardiac remodeling and  
10  
11 subcellular defects in heart failure due to myocardial infarction and aging. *Heart Fail*  
12  
13 *Rev* 2012; **17**(4-5): 671-81.  
14
- 15 17. Andrade J, Khairy P, Dobrev D, Nattel S. The clinical profile and pathophysiology  
16  
17 of atrial fibrillation: relationships among clinical features, epidemiology, and  
18  
19 mechanisms. *Circ Res* 2014; **114**(9): 1453-68.  
20  
21
- 22 18. Ham PB, 3rd, Raju R. Mitochondrial function in hypoxic ischemic injury and  
23  
24 influence of aging. *Prog Neurobiol* 2017; **157**: 92-116.  
25  
26
- 27 19. Sharashova E, Wilsgaard T, Lochen ML, Mathiesen EB, Njolstad I, Brenn T.  
28  
29 Resting heart rate trajectories and myocardial infarction, atrial fibrillation, ischaemic  
30  
31 stroke and death in the general population: The Tromso Study. *Eur J Prev Cardiol* 2017;  
32  
33 **24**(7): 748-59.  
34  
35
- 36 20. Dobre D, Kjekshus J, Rossignol P, et al. Heart rate, pulse pressure and mortality in  
37  
38 patients with myocardial infarction complicated by heart failure. *International journal*  
39  
40 *of cardiology* 2018; **271**: 181-5.  
41  
42
- 43 21. Barron HV CC, Murphy SA, Braunwald E, Gibson CM. Association between white  
44  
45 blood cell count, epicardial blood flow, myocardial perfusion, and clinical outcomes in  
46  
47 the setting of acute myocardial infarction: a thrombolysis in myocardial infarction 10  
48  
49 substudy. *Circulation* 2000; **102**(19): 2329-34.  
50  
51  
52  
53  
54  
55  
56  
57
- 58 22. Sabatine MS MD, Cannon CP, Murphy SA, Demopoulos LA, DiBattiste PM,  
59  
60

1  
2  
3  
4 McCabe CH, Braunwald E, Gibson CM. Relationship between baseline white blood  
5  
6 cell count and degree of coronary artery disease and mortality in patients with acute  
7  
8 coronary syndromes: a TACTICS-TIMI 18 (Treat Angina with Aggrastat and  
9  
10 determine Cost of Therapy with an Invasive or Conservative Strategy- Thrombolysis in  
11  
12 Myocardial Infarction 18 trial)substudy. *J Am Coll Cardiol* 2002; **40**(10): 1761-8.

13  
14  
15  
16  
17 23. Zhao X, Jiang L, Xu L, et al. Predictive value of in-hospital white blood cell count  
18  
19 in Chinese patients with triple-vessel coronary disease. *Eur J Prev Cardiol* 2019; **26**(8):  
20  
21 872-82.

22  
23  
24  
25 24. Aronson D, Hammerman H, Beyar R, et al. Serum blood urea nitrogen and long-  
26  
27 term mortality in acute ST-elevation myocardial infarction. *International journal of*  
28  
29 *cardiology* 2008; **127**(3): 380-5.

30  
31  
32  
33 25. Kirtane AJ, Leder DM, Waikar SS, et al. Serum blood urea nitrogen as an  
34  
35 independent marker of subsequent mortality among patients with acute coronary  
36  
37 syndromes and normal to mildly reduced glomerular filtration rates. *J Am Coll Cardiol*  
38  
39 2005; **45**(11): 1781-6.

40  
41  
42  
43 26. Wigger O, Bloechlinger S, Berger D, et al. Baseline serum bicarbonate levels  
44  
45 independently predict short-term mortality in critically ill patients with ischaemic  
46  
47 cardiogenic shock. *Eur Heart J Acute Cardiovasc Care* 2018; **7**(1): 45-52.

48  
49  
50  
51 27. Wang YP, Wang JH, Wang XL, et al. Roles of ST2, IL-33 and BNP in predicting  
52  
53 major adverse cardiovascular events in acute myocardial infarction after percutaneous  
54  
55 coronary intervention. *J Cell Mol Med* 2017; **21**(11): 2677-84.

56  
57  
58 28. Jia X, Sun W, Hoogeveen RC, et al. High-Sensitivity Troponin I and Incident  
59  
60

1  
2  
3  
4 Coronary Events, Stroke, Heart Failure Hospitalization, and Mortality in the ARIC  
5  
6 Study. *Circulation* 2019; **139**(23): 2642-53.  
7  
8  
9  
10  
11  
12  
13  
14  
15  
16  
17  
18  
19  
20  
21  
22  
23  
24  
25  
26  
27  
28  
29  
30  
31  
32  
33  
34  
35  
36  
37  
38  
39  
40  
41  
42  
43  
44  
45  
46  
47  
48  
49  
50  
51  
52  
53  
54  
55  
56  
57  
58  
59  
60

For peer review only

## Figure Legends

### **Figure 1. Nomogram to calculate risk score and predict 30-day survival probability in myocardial infarction patients.**

Scores were assigned for age, heart rate, WBC, BUN level, and bicarbonate level by drawing a line upward from the corresponding values to the “Score” line. The sum of all these scores, plotted on the “Total score” line, corresponds to predictions of 30-day survival probability in myocardial infarction patients. WBC, white blood cell count; bpm, beats per minute; BUN, blood urea nitrogen.

### **Figure 2. Performance evaluation of the nomogram in the primary and validation cohorts.**

Receiver operating characteristic curve analysis in the primary (a) and validation (b) cohorts. Calibration curve analysis in the primary (c) and validation (d) cohorts. The horizontal axis represents the nomogram-predicted probability of 30-day survival, and the vertical axis represents the actual observed 30-day mortality. Decision curve analysis for the primary (e) and validation (f) cohorts, implicating the net benefit with respect to the use of the nomogram. Survival curves for two groups classified by prognostic total score calculated from the nomogram in the primary (g) and validation (h) cohorts. AUC, area under the curve; CI, confidence interval.



**Table 1 Comparison of basic demographics, vital signs, laboratory tests, and 30-day mortality between the primary cohort and the validation cohort**

| Variables                 | Primary cohort<br>(n=1422) | Validation cohort<br>(n=609) | <i>P</i> |
|---------------------------|----------------------------|------------------------------|----------|
| <b>Basic demographics</b> |                            |                              |          |
| Age, years                | 67.6±14.2                  | 68.5±14.1                    | 0.195    |
| Male, n(%)                | 902 (63.4)                 | 397 (65.2)                   | 0.450    |
| Weight, kg                | 80.8 ± 19.9                | 80.7 ±19.0                   | 0.914    |
| CCU stay, n(%)            | 931 (65.5)                 | 390 (64.0)                   | 0.535    |
| Private insurance, n(%)   | 525 (36.92)                | 200 (32.84)                  | 0.079    |
| <b>Vital signs</b>        |                            |                              |          |
| Heart rate, bpm           | 84.8±17.9                  | 84.7±17.1                    | 0.910    |
| MAP, mmHg                 | 85.5±18.1                  | 85.3±17.4                    | 0.830    |
| Temperature, °C           | 36.3±0.9                   | 36.3±0.9                     | 0.619    |
| CVP (tested)              | 525 (36.9)                 | 228 (37.4)                   | 0.825    |
| <b>Laboratory tests</b>   |                            |                              |          |
| WBC, K/μL                 | 12.6±5.6                   | 12.7±5.5                     | 0.813    |
| Hemoglobin, g/dL          | 11.7±2.1                   | 11.6±2.1                     | 0.284    |
| Platelet, K/μL            | 227.8±94.0                 | 231.0±95.8                   | 0.474    |
| Creatinine, mg/dL         | 0.9(0.8-1.3)               | 1.0(0.8-1.4)                 | 0.295    |
| Creatinine kinase, U/L    | 338.0(67.0-988.6)          | 378.0(69.5-992.1)            | 0.510    |
| BNP (tested)              | 14 (1.0)                   | 5 (0.8)                      | 0.726    |
| BUN, mg/dL                | 18.0(13.8-27.0)            | 19.7(14.0-28.0)              | 0.165    |
| Bicarbonate, mg/dL        | 22.9±4.1                   | 23.1±3.9                     | 0.421    |
| pH (tested)               | 729(51.3)                  | 326(53.5)                    | 0.349    |
| pO <sub>2</sub> (tested)  | 719 (50.6)                 | 319 (52.4)                   | 0.453    |
| pCO <sub>2</sub> (tested) | 719 (50.6)                 | 319 (52.4)                   | 0.453    |
| Chloride, mg/dL           | 104.8±4.8                  | 104.5±5.2                    | 0.202    |
| Sodium, mg/dL             | 137.8±3.8                  | 137.7±3.9                    | 0.672    |
| Potassium, mg/dL          | 4.2±0.6                    | 4.2±0.7                      | 0.609    |
| Troponin (tested)         | 757(53.2)                  | 339(55.7)                    | 0.314    |
| Lactate (tested)          | 447 (31.4)                 | 212 (34.8)                   | 0.136    |
| 30-day mortality, n(%)    | 208 (14.6)                 | 95 (15.6)                    | 0.573    |

For each variable, the mean ± standard deviation, median (interquartile range) or frequency (percent) was reported as appropriate. For variables that had missing data for more than 20% of the patients in the current cohort, flags indicating whether these data were obtained were used as covariates. Continuous variables were compared using either Student's *t* test or the rank-sum test as appropriate. The chi-squared test was employed to compare the differences between categorical variables. CCU, cardiac care unit;

1  
2  
3 MAP, mean arterial pressure; bpm, beats per minute; CVP, central venous pressure; WBC, white blood  
4 cell count; BNP, brain natriuretic peptide; BUN, blood urea nitrogen.  
5  
6  
7  
8  
9  
10  
11  
12  
13  
14  
15  
16  
17  
18  
19  
20  
21  
22  
23  
24  
25  
26  
27  
28  
29  
30  
31  
32  
33  
34  
35  
36  
37  
38  
39  
40  
41  
42  
43  
44  
45  
46  
47  
48  
49  
50  
51  
52  
53  
54  
55  
56  
57  
58  
59  
60

For peer review only

**Table 2 Univariate and multivariate analyses for the relationship between the candidate risk factors and 30-day mortality in the primary cohort**

| Variables         | Univariate model |             |          | Multivariate model |             |          |
|-------------------|------------------|-------------|----------|--------------------|-------------|----------|
|                   | HR               | 95% CI      | <i>P</i> | HR                 | 95% CI      | <i>P</i> |
| Age               | 1.042            | 1.031-1.053 | <0.001   | 1.033              | 1.022-1.045 | <0.001   |
| Male              | 0.549            | 0.418-0.721 | <0.001   | 0.763              | 0.574-1.015 | 0.063    |
| Weight            | 0.989            | 0.981-0.996 | 0.002    |                    |             |          |
| Private insurance | 0.353            | 0.249-0.502 | <0.001   |                    |             |          |
| Heart rate        | 1.022            | 1.015-1.029 | <0.001   | 1.016              | 1.008-1.023 | <0.001   |
| MAP               | 0.985            | 0.977-0.993 | <0.001   |                    |             |          |
| Hemoglobin        | 0.882            | 0.828-0.940 | <0.001   |                    |             |          |
| WBC               | 1.064            | 1.049-1.079 | <0.001   | 1.029              | 1.014-1.044 | <0.001   |
| BUN               | 1.025            | 1.021-1.030 | <0.001   | 1.014              | 1.008-1.020 | <0.001   |
| Bicarbonate       | 0.842            | 0.819-0.866 | <0.001   | 0.904              | 0.875-0.933 | <0.001   |
| Creatinine        | 1.257            | 1.181-1.338 | <0.001   |                    |             |          |
| Potassium         | 1.394            | 1.193-1.630 | <0.001   | 1.169              | 0.975-1.403 | 0.092    |

HRs were estimated by Cox proportional hazards regression. All statistical tests were two-sided. The selection of the final prediction model was performed with a backward stepwise selection process. HR, hazard ratio; CI, confidence interval; MAP, mean arterial pressure; WBC, white blood cell count; BUN, blood urea nitrogen.

1  
2  
3  
4  
5  
6  
7  
8  
9  
10  
11  
12  
13  
14  
15  
16  
17  
18  
19  
20  
21  
22  
23  
24  
25  
26  
27  
28  
29  
30  
31  
32  
33  
34  
35  
36  
37  
38  
39  
40  
41  
42  
43  
44  
45  
46  
47  
48  
49  
50  
51  
52  
53  
54  
55  
56  
57  
58  
59  
60

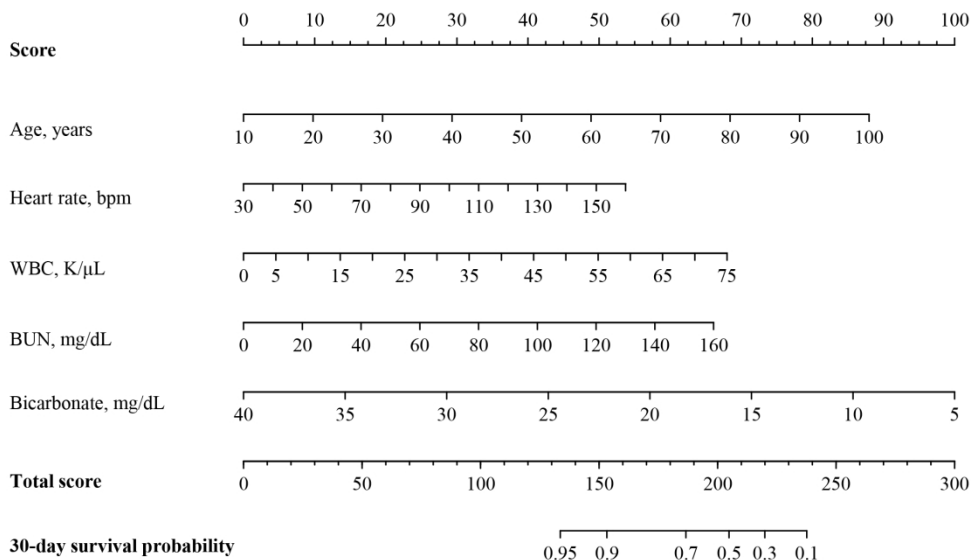

1  
2  
3  
4  
5  
6  
7  
8  
9  
10  
11  
12  
13  
14  
15  
16  
17  
18  
19  
20  
21  
22  
23  
24  
25  
26  
27  
28  
29  
30  
31  
32  
33  
34  
35  
36  
37  
38  
39  
40  
41  
42  
43  
44  
45  
46  
47  
48  
49  
50  
51  
52  
53  
54  
55  
56  
57  
58  
59  
60

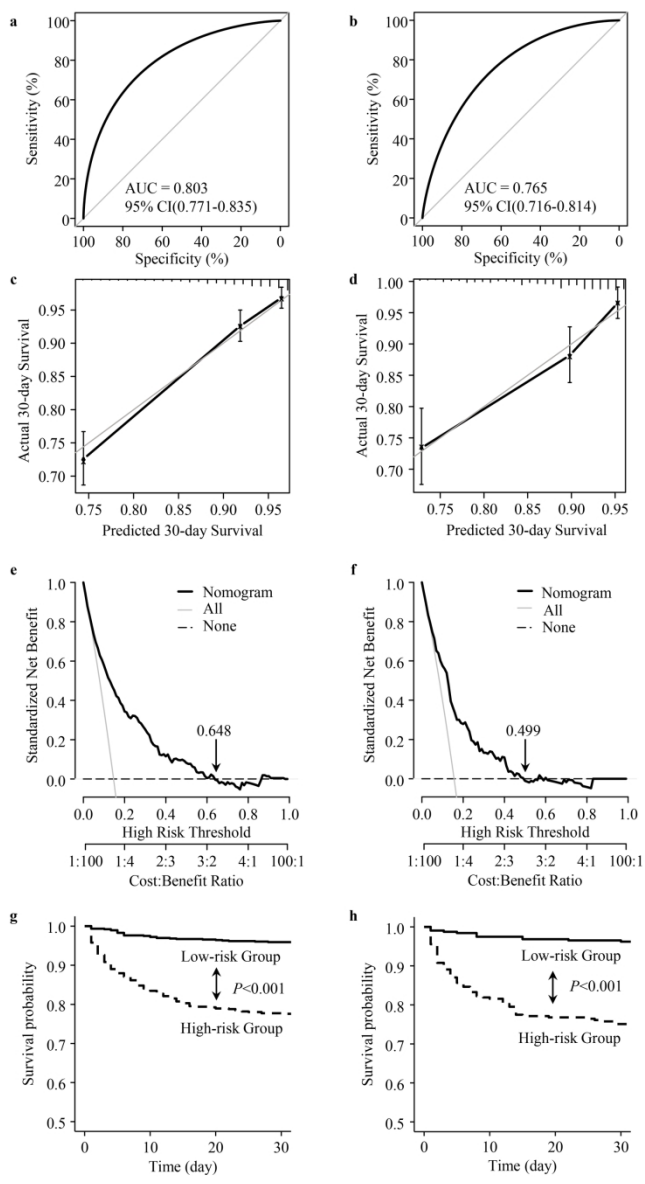

155x275mm (300 x 300 DPI)

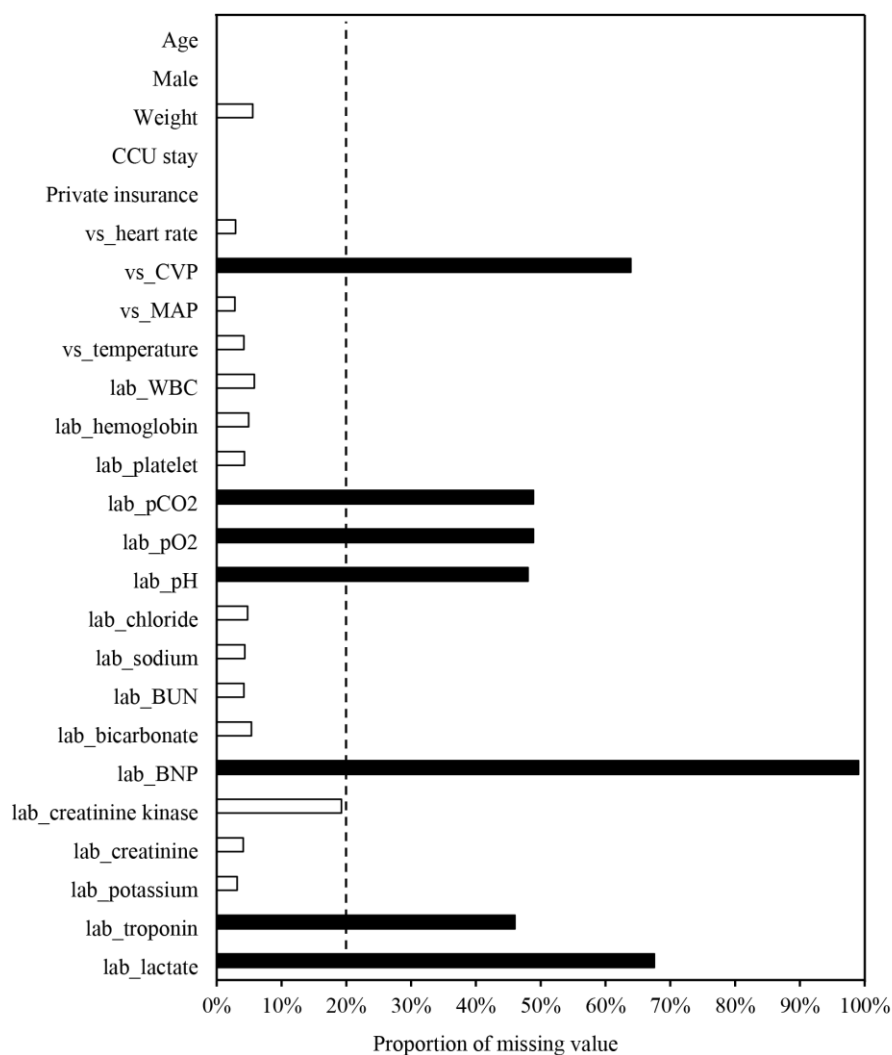

**Supplementary Figure 1. Summary of missing data.**

Black bars indicate variables with missing data for more than 20% of patients. CCU, cardiac care unit; MAP, mean arterial pressure; CVP, central venous pressure; WBC, white blood cell count; BNP, brain natriuretic peptide; BUN, blood urea nitrogen; vs, vital signs; lab, laboratory tests.

**Supplementary Table 1. Univariate analyses for the relationship between the candidate risk factors and 30-day mortality in the primary cohort**

| Variables                 | HR    | 95% CI      | P      |
|---------------------------|-------|-------------|--------|
| <b>Basic demographics</b> |       |             |        |
| age                       | 1.042 | 1.031-1.053 | <0.001 |
| male                      | 0.549 | 0.418-0.721 | <0.001 |
| Weight                    | 0.989 | 0.981-0.996 | 0.002  |
| CCU                       | 0.818 | 0.618-1.081 | 0.158  |
| Private insurance         | 0.353 | 0.249-0.502 | <0.001 |
| <b>Vital signs</b>        |       |             |        |
| Heart rate                | 1.022 | 1.015-1.029 | <0.001 |
| MAP                       | 0.985 | 0.977-0.993 | <0.001 |
| Temperature               | 0.877 | 0.768-1.002 | 0.054  |
| <b>Laboratory tests</b>   |       |             |        |
| Hemoglobin                | 0.882 | 0.828-0.940 | <0.001 |
| Platelet                  | 1.000 | 0.999-1.002 | 0.707  |
| Creatinine kinase         | 1.000 | 1.000-1.000 | 0.518  |
| WBC                       | 1.064 | 1.049-1.079 | <0.001 |
| Chloride                  | 1.018 | 0.988-1.048 | 0.241  |
| Sodium                    | 0.998 | 0.962-1.036 | 0.922  |
| BUN                       | 1.025 | 1.021-1.030 | <0.001 |
| Bicarbonate               | 0.842 | 0.819-0.866 | <0.001 |
| Creatinine                | 1.257 | 1.181-1.338 | <0.001 |
| Potassium                 | 1.394 | 1.193-1.630 | <0.001 |

HRs were estimated by Cox proportional hazards regression. All statistical tests were two-sided. HR, hazard ratio; CI, confidence interval; CCU, cardiac care unit; MAP, mean arterial pressure; WBC, white blood cell count; BUN, blood urea nitrogen.

## TRIPOD Checklist: Prediction Model Development

| Section/Topic                | Item | Checklist Item                                                                                                                                                                                        | Page |
|------------------------------|------|-------------------------------------------------------------------------------------------------------------------------------------------------------------------------------------------------------|------|
| <b>Title and abstract</b>    |      |                                                                                                                                                                                                       |      |
| Title                        | 1    | Identify the study as developing and/or validating a multivariable prediction model, the target population, and the outcome to be predicted.                                                          | 1    |
| Abstract                     | 2    | Provide a summary of objectives, study design, setting, participants, sample size, predictors, outcome, statistical analysis, results, and conclusions.                                               | 2    |
| <b>Introduction</b>          |      |                                                                                                                                                                                                       |      |
| Background and objectives    | 3a   | Explain the medical context (including whether diagnostic or prognostic) and rationale for developing or validating the multivariable prediction model, including references to existing models.      | 4    |
|                              | 3b   | Specify the objectives, including whether the study describes the development or validation of the model or both.                                                                                     | 4    |
| <b>Methods</b>               |      |                                                                                                                                                                                                       |      |
| Source of data               | 4a   | Describe the study design or source of data (e.g., randomized trial, cohort, or registry data), separately for the development and validation data sets, if applicable.                               | 5    |
|                              | 4b   | Specify the key study dates, including start of accrual; end of accrual; and, if applicable, end of follow-up.                                                                                        | 5    |
| Participants                 | 5a   | Specify key elements of the study setting (e.g., primary care, secondary care, general population) including number and location of centres.                                                          | 5    |
|                              | 5b   | Describe eligibility criteria for participants.                                                                                                                                                       | 5    |
|                              | 5c   | Give details of treatments received, if relevant.                                                                                                                                                     | NA   |
| Outcome                      | 6a   | Clearly define the outcome that is predicted by the prediction model, including how and when assessed.                                                                                                | 6    |
|                              | 6b   | Report any actions to blind assessment of the outcome to be predicted.                                                                                                                                | NA   |
| Predictors                   | 7a   | Clearly define all predictors used in developing or validating the multivariable prediction model, including how and when they were measured.                                                         | 6    |
|                              | 7b   | Report any actions to blind assessment of predictors for the outcome and other predictors.                                                                                                            | NA   |
| Sample size                  | 8    | Explain how the study size was arrived at.                                                                                                                                                            | NA   |
| Missing data                 | 9    | Describe how missing data were handled (e.g., complete-case analysis, single imputation, multiple imputation) with details of any imputation method.                                                  | 6    |
| Statistical analysis methods | 10a  | Describe how predictors were handled in the analyses.                                                                                                                                                 | 7    |
|                              | 10b  | Specify type of model, all model-building procedures (including any predictor selection), and method for internal validation.                                                                         | 7    |
|                              | 10d  | Specify all measures used to assess model performance and, if relevant, to compare multiple models.                                                                                                   | 7    |
| Risk groups                  | 11   | Provide details on how risk groups were created, if done.                                                                                                                                             | 7    |
| <b>Results</b>               |      |                                                                                                                                                                                                       |      |
| Participants                 | 13a  | Describe the flow of participants through the study, including the number of participants with and without the outcome and, if applicable, a summary of the follow-up time. A diagram may be helpful. | 8    |
|                              | 13b  | Describe the characteristics of the participants (basic demographics, clinical features, available predictors), including the number of participants with missing data for predictors and outcome.    | 8    |
| Model development            | 14a  | Specify the number of participants and outcome events in each analysis.                                                                                                                               | 8    |
|                              | 14b  | If done, report the unadjusted association between each candidate predictor and outcome.                                                                                                              | 8    |
| Model specification          | 15a  | Present the full prediction model to allow predictions for individuals (i.e., all regression coefficients, and model intercept or baseline survival at a given time point).                           | 9    |
|                              | 15b  | Explain how to use the prediction model.                                                                                                                                                              | 9    |
| Model performance            | 16   | Report performance measures (with CIs) for the prediction model.                                                                                                                                      | 10   |
| <b>Discussion</b>            |      |                                                                                                                                                                                                       |      |
| Limitations                  | 18   | Discuss any limitations of the study (such as nonrepresentative sample, few events per predictor, missing data).                                                                                      | 12   |
| Interpretation               | 19b  | Give an overall interpretation of the results, considering objectives, limitations, and results from similar studies, and other relevant evidence.                                                    | 10   |
| Implications                 | 20   | Discuss the potential clinical use of the model and implications for future research.                                                                                                                 | 11   |
| <b>Other information</b>     |      |                                                                                                                                                                                                       |      |
| Supplementary information    | 21   | Provide information about the availability of supplementary resources, such as study protocol, Web calculator, and data sets.                                                                         | 6    |
| Funding                      | 22   | Give the source of funding and the role of the funders for the present study.                                                                                                                         | 14   |

We recommend using the TRIPOD Checklist in conjunction with the TRIPOD Explanation and Elaboration document.



# BMJ Open

## Development and validation of a prognostic nomogram for myocardial infarction patients in intensive care units: a retrospective cohort study

|                                 |                                                                                                                                                                                                                                                                                                                                                                                                                                                                                                                                                                                                                                                                                                                                                                                                                                                                                          |
|---------------------------------|------------------------------------------------------------------------------------------------------------------------------------------------------------------------------------------------------------------------------------------------------------------------------------------------------------------------------------------------------------------------------------------------------------------------------------------------------------------------------------------------------------------------------------------------------------------------------------------------------------------------------------------------------------------------------------------------------------------------------------------------------------------------------------------------------------------------------------------------------------------------------------------|
| Journal:                        | <i>BMJ Open</i>                                                                                                                                                                                                                                                                                                                                                                                                                                                                                                                                                                                                                                                                                                                                                                                                                                                                          |
| Manuscript ID                   | bmjopen-2020-040291.R1                                                                                                                                                                                                                                                                                                                                                                                                                                                                                                                                                                                                                                                                                                                                                                                                                                                                   |
| Article Type:                   | Original research                                                                                                                                                                                                                                                                                                                                                                                                                                                                                                                                                                                                                                                                                                                                                                                                                                                                        |
| Date Submitted by the Author:   | 07-Oct-2020                                                                                                                                                                                                                                                                                                                                                                                                                                                                                                                                                                                                                                                                                                                                                                                                                                                                              |
| Complete List of Authors:       | Guo, Qi; Sun Yat-Sen University Sun Yat-Sen Memorial Hospital, Department of Cardiology<br>Wu, Maoxiong; Sun Yat-Sen University Sun Yat-Sen Memorial Hospital, Department of Cardiology<br>Li, Hongwei; Sun Yat-Sen University Sun Yat-Sen Memorial Hospital, Department of Cardiology<br>Ouyang, Huijun; Sun Yat-Sen University Sun Yat-Sen Memorial Hospital, Department of Cardiology<br>Sun, Runlu; Sun Yat-Sen University Sun Yat-Sen Memorial Hospital, Department of Cardiology<br>Wang, Junjie; Sun Yat-Sen University Sun Yat-Sen Memorial Hospital, Department of Cardiology<br>Liu, Zhaoyu; Sun Yat-Sen University Sun Yat-Sen Memorial Hospital, Department of Cardiology<br>Wang, Jingfeng; Sun Yat-Sen University Sun Yat-Sen Memorial Hospital, Department of Cardiology<br>Zhang, Yuling; Sun Yat-Sen University Sun Yat-Sen Memorial Hospital, Department of Cardiology |
| <b>Primary Subject Heading</b>: | Cardiovascular medicine                                                                                                                                                                                                                                                                                                                                                                                                                                                                                                                                                                                                                                                                                                                                                                                                                                                                  |
| Secondary Subject Heading:      | Intensive care, Medical management                                                                                                                                                                                                                                                                                                                                                                                                                                                                                                                                                                                                                                                                                                                                                                                                                                                       |
| Keywords:                       | Myocardial infarction < CARDIOLOGY, INTENSIVE & CRITICAL CARE, Risk management < HEALTH SERVICES ADMINISTRATION & MANAGEMENT                                                                                                                                                                                                                                                                                                                                                                                                                                                                                                                                                                                                                                                                                                                                                             |
|                                 |                                                                                                                                                                                                                                                                                                                                                                                                                                                                                                                                                                                                                                                                                                                                                                                                                                                                                          |

SCHOLARONE™  
Manuscripts



I, the Submitting Author has the right to grant and does grant on behalf of all authors of the Work (as defined in the below author licence), an exclusive licence and/or a non-exclusive licence for contributions from authors who are: i) UK Crown employees; ii) where BMJ has agreed a CC-BY licence shall apply, and/or iii) in accordance with the terms applicable for US Federal Government officers or employees acting as part of their official duties; on a worldwide, perpetual, irrevocable, royalty-free basis to BMJ Publishing Group Ltd ("BMJ") its licensees and where the relevant Journal is co-owned by BMJ to the co-owners of the Journal, to publish the Work in this journal and any other BMJ products and to exploit all rights, as set out in our [licence](#).

The Submitting Author accepts and understands that any supply made under these terms is made by BMJ to the Submitting Author unless you are acting as an employee on behalf of your employer or a postgraduate student of an affiliated institution which is paying any applicable article publishing charge ("APC") for Open Access articles. Where the Submitting Author wishes to make the Work available on an Open Access basis (and intends to pay the relevant APC), the terms of reuse of such Open Access shall be governed by a Creative Commons licence – details of these licences and which [Creative Commons](#) licence will apply to this Work are set out in our licence referred to above.

Other than as permitted in any relevant BMJ Author's Self Archiving Policies, I confirm this Work has not been accepted for publication elsewhere, is not being considered for publication elsewhere and does not duplicate material already published. I confirm all authors consent to publication of this Work and authorise the granting of this licence.

1  
2  
3  
4 **Development and validation of a prognostic nomogram for myocardial infarction**  
5  
6 **patients in intensive care units: a retrospective cohort study**  
7

8  
9 Qi Guo,<sup>1,2</sup> Maoxiong Wu,<sup>1,2</sup> Hongwei Li,<sup>1,2</sup> Huijun Ouyang,<sup>1,2</sup> Runlu Sun,<sup>1,2</sup> Junjie

10  
11 Wang,<sup>1,2</sup> Zhaoyu Liu,<sup>1,2</sup> Jingfeng Wang,<sup>1,2</sup> Yuling Zhang<sup>1,2</sup>  
12

13  
14 <sup>1</sup>Department of Cardiology, Sun Yat-sen Memorial Hospital of Sun Yat-sen University,  
15  
16 Guangzhou, China  
17

18  
19 <sup>2</sup>Guangdong Province Key Laboratory of Arrhythmia and Electrophysiology,  
20  
21 Guangzhou, China  
22  
23

24  
25  
26  
27 **Corresponding author at:** Department of Cardiology, Sun Yat-sen Memorial Hospital  
28  
29 of Sun Yat-sen University, No. 107 West Yanjiang Road, Guangzhou, 510120, China.

30  
31 E-mail address: [zzhangyuling@126.com](mailto:zzhangyuling@126.com) (Yuling Zhang)  
32

33  
34  
35 Tel: 86-20-81332360  
36

37  
38 Fax: 86-20-81332360  
39

40  
41 Dr Qi Guo and Dr Maoxiong Wu contributed equally to this work.  
42

43 **Word count:** 2845  
44  
45  
46  
47  
48  
49  
50  
51  
52  
53  
54  
55  
56  
57  
58  
59  
60

## ABSTRACT

**Objectives:** We aimed to develop and validate a prognostic nomogram and evaluate the discrimination of the nomogram model in order to improve the prediction of 30-day survival of critically ill myocardial infarction (MI) patients.

**Design:** A retrospective cohort study.

**Setting:** Data were collected from the Medical Information Mart for Intensive Care (MIMIC)-III database, consisting of critically ill participants between 2001 and 2012 in the United States.

**Participants:** A total of 2031 adult critically ill patients with MI were enrolled from the MIMIC-III database.

**Primary and secondary outcome:** Thirty-day survival.

**Results:** Independent prognostic factors, including age, heart rate, white blood cell count, blood urea nitrogen, and bicarbonate, were identified by Cox regression model and used in the nomogram. Good agreement between the prediction and observation was indicated by the calibration curve for 30-day survival. The nomogram exhibited reasonably accurate discrimination [area under the receiver operating characteristic curve, 0.765, 95% (confidence interval) CI, 0.716-0.814] and calibration (C-index, 0.758, 95% CI, 0.712-0.804) in the validation cohort. Decision curve analysis demonstrated that the nomogram was clinically beneficial. Additionally, participants could be classified into two risk groups by the nomogram, and the 30-day survival probability was significantly different between them ( $P < 0.001$ ).

**Conclusions:** This five-factor nomogram can achieve a reasonable degree of accuracy

1  
2  
3  
4 to predict 30-day survival in critically ill MI patients and might be helpful for risk  
5  
6 stratification and decision making for MI patients.  
7  
8

9 **Keywords:** myocardial infarction; 30-day survival; intensive care unit; nomogram;  
10  
11 prognostic model  
12  
13

## 14 **Article Summary**

### 15 **Strengths and limitations of this study**

16  
17 This is the first study to develop and validate a prognostic nomogram for myocardial  
18  
19 infarction (MI) patients in the intensive care unit (ICU).  
20  
21

22  
23 The area under the receiver operating characteristic curve, calibration curves, decision  
24  
25 curve analysis and survival curves were enrolled to evaluate the performance of this  
26  
27 novel nomogram model in both the primary cohort and validation cohort.  
28  
29

30  
31 Multiple imputation was used to handle the covariates with less than 20% missing to  
32  
33 minimize the bias resulting from missing values.  
34  
35

36  
37 ST elevation, oliguria, and ventricular arrhythmias, were not accessible in this study,  
38  
39 and this might lead to reduced effectiveness of this nomogram.  
40  
41

42  
43 We could not compare the performance of nomogram model with existing model, such  
44  
45 the Thrombolysis in Myocardial Infarction (TIMI) score and the Global Registry of  
46  
47 Acute Coronary Events (GRACE) score.  
48  
49  
50  
51  
52  
53  
54  
55  
56  
57  
58  
59  
60

## Introduction

Myocardial infarction (MI) is a major health problem that causes high mortality and high economic costs worldwide.<sup>1</sup> A substantial proportion of MI patients are admitted to the intensive care unit (ICU).<sup>2</sup> However, not all MI patients benefit from ICU care.<sup>3</sup> It is necessary to perform risk stratification for MI to help clinicians make more efficient decisions, which provides benefits for more MI patients.

Nomograms are popular prognostic tools with the ability to predict clinical events by integrating potential risk factors.<sup>4</sup> Nomograms have been widely used for tumor prognosis, supporting the movement towards personalized oncology medicine.<sup>5</sup> Recently, a nomogram was effectively used to predict both short-term and long-term survival for asymptomatic adults undergoing screening for cardiac risk factors.<sup>6</sup> Thus, we hypothesized that a nomogram may also be feasible for the risk stratification of critically ill MI patients.

This study aimed to identify prognostic factors for the 30-day mortality of critically ill MI patients and establish a prognostic nomogram based on a multivariable Cox regression model in a primary cohort. Furthermore, the performance and clinical benefits of the nomogram were assessed in a validation cohort to validate the accuracy and utility of the prognostic nomogram model. The nomogram could be easily applied in clinical practice to identify high-risk patients and guide decision making.

## Methods

### Data source

The data were retrieved from the Medical Information Mart for Intensive Care

1  
2  
3  
4 (MIMIC-III) dataset. The MIMIC-III integrates the comprehensive clinical data of  
5  
6 53,423 stays of adult patients in the ICU between 2001 and 2012. An average of 4,597  
7  
8 charted observations and 380 laboratory measurements are available for individual  
9  
10 hospital admissions. The overall information is saved as a relational database,  
11  
12 consisting of patient demographics, laboratory tests, discharge summaries,  
13  
14 electrocardiographs, imaging examinations, diagnostic information such as the  
15  
16 International Classification of Disease (ICD)-9 code, and in-hospital and out-of-  
17  
18 hospital mortality. The use of MIMIC-III database was under the approval from the  
19  
20 review boards of the Massachusetts Institute of Technology and Beth Israel Deaconess  
21  
22 Medical Center.<sup>7</sup> All the patients in the database have been deidentified for privacy,  
23  
24 and the need for informed consent was waived. This study was conducted in accordance  
25  
26 with the recommendations of the Transparent Reporting of a multivariable prediction  
27  
28 model for Individual Prognosis Or Diagnosis (TRIPOD) statement.<sup>8</sup>  
29  
30  
31  
32  
33  
34  
35  
36  
37

### 38 **Study cohort**

39  
40 Patients admitted to the ICU who were diagnosed with MI were eligible for inclusion.  
41  
42 After screening of the MIMIC-III database, a total of 2,031 patients with MI were  
43  
44 included for analysis. The cohort was randomly divided into the primary cohort and the  
45  
46 validation cohort in a ratio of 7:3; the primary cohort was used to establish the  
47  
48 nomogram, and the validation cohort was used for validation.  
49  
50  
51

### 52 **Data extraction**

53  
54 Structure Query Language was used for data extraction. For patients with multiple ICU  
55  
56 admissions, only the data of the patient's first ICU admission were used in this study.  
57  
58  
59  
60

1  
2  
3  
4 All data regarding baseline characteristics were collected as the first value in the initial  
5  
6 24 hours following admission. The variables for the following analysis included (1)  
7  
8 basic demographics, including age, sex, weight, coronary care unit stay and private  
9  
10 insurance; (2) vital signs, including heart rate, mean arterial pressure (MAP),  
11  
12 temperature and central venous pressure (CVP); and (3) laboratory tests, including tests  
13  
14 of white blood cell count (WBC), hemoglobin, platelets, serum creatinine, creatinine  
15  
16 kinase, type B natriuretic peptide (BNP), blood urea nitrogen (BUN) level, bicarbonate  
17  
18 level, pH, partial pressure of oxygen (pO<sub>2</sub>), partial pressure of carbon dioxide (pCO<sub>2</sub>),  
19  
20 chloride, sodium, potassium, troponin and lactate.  
21  
22  
23  
24  
25

26  
27 In this study, we regarded 30-day survival as the outcome measure, which was also  
28  
29 extracted from the MIMIC-III database.  
30  
31

### 32 **Management of missing data**

33  
34 Variables with missing data are common in the MIMIC-III database. More than 20%  
35  
36 of the data regarding CVP, pCO<sub>2</sub>, pO<sub>2</sub>, pH, BNP, troponin, and lactate were missing,  
37  
38 and these parameters were not qualified for establishment of the nomogram  
39  
40 (Supplementary Figure 1). A flag indicating whether these data were obtained is shown  
41  
42 in the characteristics table. For variables that had missing data for less than 20% of  
43  
44 patients, missing values were filled with predictors using multiple imputation to  
45  
46 minimize the bias resulting from missing values.<sup>9</sup>  
47  
48  
49  
50  
51

### 52 **Statistical analysis**

53  
54 Continuous variables are expressed as the mean ± standard deviation or median  
55  
56 (interquartile range, IQR), as appropriate. Categorical data are expressed as numbers  
57  
58  
59  
60



(percentages). Continuous variables were compared using Student's *t* test or the rank-sum test, as appropriate. Categorical variables were compared by the chi-squared test.

In this study, the objective was to develop a fast-to-use prognostic model for 30-day mortality in critically ill MI patients. And Cox proportional hazards model was the most frequently used regression model for survival analysis and thus was enrolled in this study. Univariate Cox regression was used to screen for variables that were significantly associated with 30-day survival in the primary cohort. The proportional hazards assumption was checked based on the scaled Schoenfeld residuals using *survival* package in R tool. Potential prognostic factors that were significant in the univariate Cox regression model were entered into the multivariable Cox proportional hazard model, in which the hazard ratio (HR), which was used to approximate risk of event, was also calculated. To avoid too many variables entering into the final model and influencing the practicality of model, a strict cut-off value of 0.05 was chosen. The backward stepwise process based on the Akaike information criterion was used to control the overfitting of the model.

A nomogram based on the results of previous multivariable analyses was constructed. The calibration, discrimination and clinical usefulness of the nomogram were calculated to evaluate its performance.<sup>10</sup> The area under the receiver operating characteristic curve (AUC) and Harrell's concordance index (C-index) were used to assess the predictive capacity of the prediction model. Confidence intervals (CIs) were obtained by creating 1000 bootstrap samples from the corresponding cohort and replicating the estimation process. The calibration curve was used to analyze the

1  
2  
3  
4 agreement between the nomogram and actual observation. Decision curve analysis was  
5  
6 performed to assess the clinical usefulness of the prognostic nomogram by quantifying  
7  
8 the standardized net benefits at different threshold probabilities. Survival curves were  
9  
10 used to compare the survival probability between the low-risk group and the high-risk  
11  
12 group defined by the nomogram.  
13  
14

15  
16 A two-tailed  $P$  value  $< 0.05$  was considered statistically significant in our study. SPSS  
17  
18 software (version 23.0, IBM, NY, USA) and R software (version 3.6.3, R Foundation  
19  
20 for Statistical Computing, Vienna, Austria) were used for statistical analysis.  
21  
22

### 23 24 **Patient and Public Involvement**

25  
26 Patients and/or the public were not directly involved in this study.  
27  
28

### 29 30 **Results**

#### 31 32 **Baseline characteristics of the primary cohort and validation cohort**

33  
34 The primary cohort and validation cohort consisted of 1,422 and 609 MI patients,  
35  
36 respectively. All baseline characteristics of the primary cohort and validation cohort  
37  
38 were shown in Table 1. There were no significant differences in the baseline  
39  
40 characteristics between the primary cohort and validation cohort (all  $P > 0.05$ ).  
41  
42

#### 43 44 **Prognostic factors in the primary cohort**

45  
46 Basic demographics, vital signs, and laboratory tests in the primary cohort were further  
47  
48 examined by the univariate Cox regression model for the prediction of 30-day mortality  
49  
50 (Supplementary Table 1). Variables including age, male sex, weight, private insurance,  
51  
52 heart rate, MAP, hemoglobin WBC, BUN level, bicarbonate level, creatinine level, and  
53  
54 potassium level were potential predictors of 30-day mortality in the univariate analysis  
55  
56  
57  
58  
59  
60

1  
2  
3  
4 ( $P < 0.05$ ). All these candidate factors were entered into the multivariable Cox  
5  
6 proportional hazard model, and five prognostic factors, namely, age, heart rate, WBC,  
7  
8 BUN level and bicarbonate level, were included in the final prediction model (each  $P$   
9  
10  
11  
12  $< 0.05$ ) (Table 2).

### 13 14 **A prognostic nomogram for 30-day survival**

15  
16  
17 A prognostic nomogram for 30-day survival was established with the five prognostic  
18  
19 factors obtained from the multivariable Cox proportional hazard model (Figure 1). The  
20  
21 nomogram was generated by assigning a weighted score to each of the independent  
22  
23 prognostic parameters. The scales of age, heart rate, WBC, BUN level, and bicarbonate  
24  
25 level ranged from 10 to 100, 30 to 150, 0 to 75, 0 to 160, and 40 to 5, respectively. The  
26  
27 highest total score was 300 points, and the scale of the 30-day survival probability  
28  
29 ranged from 0.95 to 0.1. A higher score calculated from the sum of the assigned points  
30  
31 for each prognostic factor in the nomogram corresponded to a lower probability of  
32  
33 survival in 30 days.

34  
35  
36 For instance, one MI patient with an age of 70 years old (57 points), a heart rate of 110  
37  
38 bpm (33 points), a WBC of 11 K/ $\mu$ L (10 points), a BUN level of 80 mg/dL (33 points)  
39  
40 and a bicarbonate level of 10 mg/dL (85 points) had a total score of 218 points, which  
41  
42 corresponded to an approximately 30% 30-day survival probability (Supplementary  
43  
44  
45  
46  
47  
48  
49  
50  
51 Figure 2).

52  
53  
54 Another MI patient who had an age of 50 years old (39 points), a heart rate of 70 bpm  
55  
56 (17 points), a WBC of 11 K/ $\mu$ L (10 points), a BUN level of 60 mg/dL (25 points) and  
57  
58 a bicarbonate level of 18 mg/dL (63 points) had a total score of 154 points. Then this  
59  
60

1  
2  
3  
4 MI patient was predicted to suffer 90% 30-day survival probability (Supplementary  
5  
6  
7 Figure 3).

### 9 **Performance evaluation of the prognostic nomogram**

10  
11 The AUC indicated that the predictive capacity of the prediction model was 0.803 (95%  
12  
13 CI, 0.771-0.835) in the primary cohort and 0.765 (95% CI, 0.716-0.814) in the  
14  
15 validation cohort (Figure 2A, B). The C-index was 0.787 (95% CI, 0.757-0.817) for the  
16  
17 primary cohort and 0.758 (95% CI, 0.712-0.804) for the validation cohort. The  
18  
19 calibration plot demonstrated adequate fit of the nomogram for predicting 30-day  
20  
21 survival, which was consistent with the Kaplan-Meier estimate in both the primary  
22  
23 cohort and validation cohort (Figure 2C, D). The decision curve analysis showed the  
24  
25 net benefits obtained from the application of our nomogram with threshold probabilities  
26  
27 of 0.648 and 0.499 in the primary cohort and validation cohort, respectively (Figure 2E,  
28  
29 F). Participants could be classified into low-risk and high-risk groups by the nomogram.  
30  
31 Survival curves revealed a significantly lower survival probability in the high-risk  
32  
33 group than in the low-risk group in both the primary cohort and validation cohort  
34  
35 ( $P<0.001$ ), which indicated the substantial discriminatory power of the nomogram to  
36  
37 distinguish low-risk and high-risk MI patients in the ICU (Figure 3).

### 48 **Discussion**

49  
50 This study extracted clinical data and survival information of 2,031 MI patients from  
51  
52 the MIMIC-III database. Five risk factors for 30-day mortality of MI, including age,  
53  
54 heart rate, WBC, BUN level, and bicarbonate level, were identified by univariate and  
55  
56 multivariable Cox regression models and used to establish a prognostic nomogram. To  
57  
58  
59  
60



1  
2  
3  
4 is the first to provide a simple-to-use prognostic nomogram with five factors that are  
5  
6 easily accessible on the first-day admission, and this nomogram might improve timely  
7  
8 individualized risk stratification and the prevention of fatal outcomes. The satisfactory  
9  
10 performance of this model was reflected by its moderate predictive ability, indicated by  
11  
12 an AUC greater than 0.75 in both the primary cohort and validation cohort. Additionally,  
13  
14 the calibration analysis performed in two cohorts revealed that the predicted 30-day  
15  
16 mortality was similar to the actual 30-day mortality. Furthermore, decision curve  
17  
18 analysis indicated that the net clinical benefits were positive in MI patients, with a  
19  
20 probability of up to 50% in both cohorts. A difference in threshold probability between  
21  
22 primary and validation cohort was observed in our study. This difference may be due  
23  
24 to the potential heterogeneity between these two cohorts, such as the level of variables  
25  
26 or mortality rate, although which had not shown significant differences in statistical  
27  
28 analyses. Overall, both two decision curves indicated a net benefit with respect to the  
29  
30 use of nomogram model. The survival curves also revealed the good discriminative  
31  
32 capacity to identify high-risk and low-risk patients in both the primary cohort and  
33  
34 validation cohort.  
35  
36  
37  
38  
39  
40  
41  
42  
43  
44

45 It should be noted that only five prognostic factors were used in the final nomogram  
46  
47 model. Age has been widely recognized as one of the most powerful risk factors in  
48  
49 cardiovascular diseases, such as vascular senescence, cardiac remodeling, and atrial  
50  
51 fibrillation.<sup>15-17</sup> Decreased expression of antioxidative factors and increased expression  
52  
53 of oxidative molecular mediators occur in elderly patients, leading to aggravating  
54  
55 ischemic injury.<sup>15,18</sup> Heart rate is also an important prognostic factor for cardiovascular  
56  
57  
58  
59  
60

1  
2  
3  
4 mortality. A higher resting heart rate was reported to be positively related to a higher  
5  
6 risk of MI and all-cause mortality.<sup>19,20</sup> These results were consistent with our study, in  
7  
8 which heart rate was positively associated with mortality of MI.  
9  
10

11 Among lab tests, WBC has also been shown to be a potential risk factor and to be  
12  
13 associated with myocardial perfusion and the severity of coronary artery disease.<sup>21,22</sup> A  
14  
15 recent cohort study of triple-vessel coronary artery disease revealed the independent  
16  
17 prognostic value of both total and differential white blood cell counts for predicting  
18  
19 long-term mortality.<sup>23</sup> BUN level has also been demonstrated to be independently  
20  
21 associated with mortality in patients with MI, even in patients with normal to mildly  
22  
23 reduced glomerular filtration rates.<sup>24,25</sup> Bicarbonate is a central biomarker that reflects  
24  
25 acid-base equilibrium and is affected by electrolyte disturbance. In this study,  
26  
27 bicarbonate level was negatively related to 30-day mortality, which was consistent with  
28  
29 another cohort study of cardiogenic shock patients hospitalized in the ICU.<sup>26</sup> In short,  
30  
31 these five factors included in the nomogram were all credible prognostic factors for  
32  
33 cardiovascular mortality, and these factors could be used in clinical work.  
34  
35  
36  
37  
38  
39  
40  
41  
42

43 Several limitations should be pointed out. Firstly, a few previously reported  
44  
45 independent predictors for major cardiovascular events, including BNP and troponin,  
46  
47 were not included to minimize the bias from excessive missing values.<sup>27,28</sup> Hence, the  
48  
49 prognostic value of these factors for MI could not be estimated. Secondly, ST elevation,  
50  
51 oliguria, and ventricular arrhythmias, were not accessible in this study, and this might  
52  
53 lead to reduced effectiveness of this nomogram. GRACE score and TIMI score could  
54  
55 not be obtained, and thus the comparison between nomogram model and these two  
56  
57  
58  
59  
60

1  
2  
3  
4 score models could not be made. Thirdly, the model still required more samples to  
5  
6 validate its viability. Although we performed random allocation to establish a validation  
7  
8 cohort with 30% of the total sample size for the verification of the superiority of our  
9  
10 model, a large external cohort would further enhance the credibility and effectiveness  
11  
12 of our model in future studies.  
13  
14

15  
16  
17 In conclusion, our study developed a prognostic nomogram with five factors, including  
18  
19 age, heart rate, WBC, BUN level, and bicarbonate level, for the prediction of 30-day  
20  
21 survival in critically ill MI patients in the ICU. This nomogram performed well and  
22  
23 might be helpful in risk stratification and decision making for MI patients undergoing  
24  
25 clinical treatment.  
26  
27  
28  
29  
30  
31  
32  
33  
34  
35  
36  
37  
38  
39  
40  
41  
42  
43  
44  
45  
46  
47  
48  
49  
50  
51  
52  
53  
54  
55  
56  
57  
58  
59  
60



## Acknowledgments

We would like to thank the participants, developers and investigators associated with the Medical Information Mart for Intensive Care (MIMIC)-III database.

## Author contributions

**Qi Guo:** Conceptualization, data analysis, Writing-original draft, Writing-review&editing. **Maoxiong Wu:** Conceptualization, Writing-original draft, Writing-review&editing. **Hongwei Li:** Writing-original draft, Data curation. **Huijun Ouyang:** Literature search, Data interpretation. **Runlu Sun:** Data collection, Data curation. **Junjie Wang:** Data collection, Data curation. **Zhaoyu Liu:** Literature search, Data interpretation. **Jingfeng Wang:** Conceptualization, Writing-review&editing, Data curation. **Yuling Zhang:** Conceptualization, Writing-review&editing, Data curation.

## Funding Sources

This study was funded by grants from the National Natural Science Foundation of China (No. 81970388 and No. 81900387), Guangdong Basic and Applied Basic Research Found (No. 2019A1515011806) and Fundamental Research Funds for the Central Universities (No. 19ykpy97).

## Disclaimer

The funders had no roles in study design, data collection, data analysis, interpretation and writing of the report.

## Declaration of Interests

All authors declare no potential conflicts of interest.

## Data availability statement

1  
2  
3  
4 The dataset analyzed to generate the findings for this study are available from the  
5  
6 corresponding author on reasonable request.  
7  
8  
9  
10  
11  
12  
13  
14  
15  
16  
17  
18  
19  
20  
21  
22  
23  
24  
25  
26  
27  
28  
29  
30  
31  
32  
33  
34  
35  
36  
37  
38  
39  
40  
41  
42  
43  
44  
45  
46  
47  
48  
49  
50  
51  
52  
53  
54  
55  
56  
57  
58  
59  
60

For peer review only

## References

1. Virani SS, Alonso A, Benjamin EJ, et al. Heart Disease and Stroke Statistics-2020 Update: A Report From the American Heart Association. *Circulation* 2020; CIR00000000000000757.
2. Zhou L, Tao Z, Wu Y, et al. Individual and institutional factors affecting cardiac monitoring in coronary care units: a national survey of Chinese nurses. *Int J Nurs Stud* 2012; **49**(5): 570-8.
3. Valley TS, Iwashyna TJ, Cooke CR, et al. Intensive care use and mortality among patients with ST elevation myocardial infarction: retrospective cohort study. *BMJ* 2019; **365**: 11927.
4. Balachandran VP, Gonen M, Smith JJ, DeMatteo RP. Nomograms in oncology: more than meets the eye. *The Lancet Oncology* 2015; **16**(4): e173-e80.
5. Iasonos A, Schrag D, Raj GV, Panageas KS. How to build and interpret a nomogram for cancer prognosis. *J Clin Oncol* 2008; **26**(8): 1364-70.
6. B OH, Gransar H, Callister T, et al. Development and Validation of a Simple-to-Use Nomogram for Predicting 5-, 10-, and 15-Year Survival in Asymptomatic Adults Undergoing Coronary Artery Calcium Scoring. *JACC Cardiovasc Imaging* 2018; **11**(3): 450-8.
7. Johnson AEW, Pollard TJ, Shen L, et al. MIMIC-III, a freely accessible critical care database. *Sci Data* 2016; **3**: 160035.
8. Collins GS, Reitsma JB, Altman DG, Moons KG. Transparent reporting of a multivariable prediction model for individual prognosis or diagnosis (TRIPOD): the

1  
2  
3  
4 TRIPOD statement. *BMJ* 2015; **350**: g7594.  
5

6  
7 9. Zhang Z. Multiple imputation with multivariate imputation by chained equation  
8  
9 (MICE) package. *Ann Transl Med* 2016; **4**(2): 30.  
10

11  
12 10. Alba AC, Agoritsas T, Walsh M, et al. Discrimination and Calibration of Clinical  
13  
14 Prediction Models: Users' Guides to the Medical Literature. *Jama* 2017; **318**(14): 1377-  
15  
16 84.  
17

18  
19 11. Antman EM CM, Bernink PJ, McCabe CH, Horacek T, Papuchis G, Mautner B,  
20  
21 Corbalan R, Radley D, Braunwald E. The TIMI risk score for unstable angina/non-ST  
22  
23 Elevation MI: a method for prognostication and therapeutic decision making. *Jama*  
24  
25 2000; **284**(7): 835-42.  
26  
27

28  
29 12. Morrow DA, Antman EM, Charlesworth A, et al. TIMI risk score for ST-elevation  
30  
31 myocardial infarction: A convenient, bedside, clinical score for risk assessment at  
32  
33 presentation: An intravenous nPA for treatment of infarcting myocardium early II trial  
34  
35 substudy. *Circulation* 2000; **102**(17): 2031-7.  
36  
37

38  
39 13. Granger CB GR, Dabbous O, Pieper KS, Eagle KA, Cannon CP, Van De Werf F,  
40  
41 Avezum A, Goodman SG, Flather MD, Fox KAA, Global Registry of Acute Coronary  
42  
43 Events Investigators. Predictors of hospital mortality in the global registry of acute  
44  
45 coronary events. *Archives of internal medicine* 2003; **163**(19): 2345-53.  
46  
47

48  
49 14. Plakht Y, Shiyovich A, Weitzman S, Fraser D, Zahger D, Gilutz H. A new risk  
50  
51 score predicting 1- and 5-year mortality following acute myocardial infarction Soroka  
52  
53 Acute Myocardial Infarction (SAMI) Project. *International journal of cardiology* 2012;  
54  
55 **154**(2): 173-9.  
56  
57  
58  
59  
60

- 1  
2  
3  
4 15. Salazar G. NADPH Oxidases and Mitochondria in Vascular Senescence. *Int J Mol*  
5  
6  
7 *Sci* 2018; **19**(5).
- 8  
9 16. Dhalla NS, Rangi S, Babick AP, Zieroth S, Elimban V. Cardiac remodeling and  
10  
11 subcellular defects in heart failure due to myocardial infarction and aging. *Heart Fail*  
12  
13 *Rev* 2012; **17**(4-5): 671-81.
- 14  
15  
16 17. Andrade J, Khairy P, Dobrev D, Nattel S. The clinical profile and pathophysiology  
17  
18 of atrial fibrillation: relationships among clinical features, epidemiology, and  
19  
20 mechanisms. *Circ Res* 2014; **114**(9): 1453-68.
- 21  
22  
23 18. Ham PB, 3rd, Raju R. Mitochondrial function in hypoxic ischemic injury and  
24  
25 influence of aging. *Prog Neurobiol* 2017; **157**: 92-116.
- 26  
27  
28 19. Sharashova E, Wilsgaard T, Lochen ML, Mathiesen EB, Njolstad I, Brenn T.  
29  
30 Resting heart rate trajectories and myocardial infarction, atrial fibrillation, ischaemic  
31  
32 stroke and death in the general population: The Tromso Study. *Eur J Prev Cardiol* 2017;  
33  
34  
35 **24**(7): 748-59.
- 36  
37  
38 20. Dobre D, Kjekshus J, Rossignol P, et al. Heart rate, pulse pressure and mortality in  
39  
40 patients with myocardial infarction complicated by heart failure. *International journal*  
41  
42 *of cardiology* 2018; **271**: 181-5.
- 43  
44  
45 21. Barron HV CC, Murphy SA, Braunwald E, Gibson CM. Association between white  
46  
47 blood cell count, epicardial blood flow, myocardial perfusion, and clinical outcomes in  
48  
49 the setting of acute myocardial infarction: a thrombolysis in myocardial infarction 10  
50  
51 substudy. *Circulation* 2000; **102**(19): 2329-34.
- 52  
53  
54 22. Sabatine MS MD, Cannon CP, Murphy SA, Demopoulos LA, DiBattiste PM,  
55  
56  
57  
58  
59  
60

1  
2  
3  
4 McCabe CH, Braunwald E, Gibson CM. Relationship between baseline white blood  
5  
6 cell count and degree of coronary artery disease and mortality in patients with acute  
7  
8 coronary syndromes: a TACTICS-TIMI 18 (Treat Angina with Aggrastat and  
9  
10 determine Cost of Therapy with an Invasive or Conservative Strategy- Thrombolysis in  
11  
12 Myocardial Infarction 18 trial)substudy. *J Am Coll Cardiol* 2002; **40**(10): 1761-8.

13  
14  
15  
16  
17 23. Zhao X, Jiang L, Xu L, et al. Predictive value of in-hospital white blood cell count  
18  
19 in Chinese patients with triple-vessel coronary disease. *Eur J Prev Cardiol* 2019; **26**(8):  
20  
21 872-82.

22  
23  
24  
25 24. Aronson D, Hammerman H, Beyar R, et al. Serum blood urea nitrogen and long-  
26  
27 term mortality in acute ST-elevation myocardial infarction. *International journal of*  
28  
29 *cardiology* 2008; **127**(3): 380-5.

30  
31  
32  
33 25. Kirtane AJ, Leder DM, Waikar SS, et al. Serum blood urea nitrogen as an  
34  
35 independent marker of subsequent mortality among patients with acute coronary  
36  
37 syndromes and normal to mildly reduced glomerular filtration rates. *J Am Coll Cardiol*  
38  
39 2005; **45**(11): 1781-6.

40  
41  
42  
43 26. Wigger O, Bloechlinger S, Berger D, et al. Baseline serum bicarbonate levels  
44  
45 independently predict short-term mortality in critically ill patients with ischaemic  
46  
47 cardiogenic shock. *Eur Heart J Acute Cardiovasc Care* 2018; **7**(1): 45-52.

48  
49  
50  
51 27. Wang YP, Wang JH, Wang XL, et al. Roles of ST2, IL-33 and BNP in predicting  
52  
53 major adverse cardiovascular events in acute myocardial infarction after percutaneous  
54  
55 coronary intervention. *J Cell Mol Med* 2017; **21**(11): 2677-84.

56  
57  
58  
59 28. Jia X, Sun W, Hoogeveen RC, et al. High-Sensitivity Troponin I and Incident  
60

1  
2  
3  
4 Coronary Events, Stroke, Heart Failure Hospitalization, and Mortality in the ARIC  
5  
6 Study. *Circulation* 2019; **139**(23): 2642-53.  
7  
8  
9  
10  
11  
12  
13  
14  
15  
16  
17  
18  
19  
20  
21  
22  
23  
24  
25  
26  
27  
28  
29  
30  
31  
32  
33  
34  
35  
36  
37  
38  
39  
40  
41  
42  
43  
44  
45  
46  
47  
48  
49  
50  
51  
52  
53  
54  
55  
56  
57  
58  
59  
60

For peer review only

## Figure Legends

### **Figure 1. Nomogram to calculate risk score and predict 30-day survival probability in myocardial infarction patients.**

Scores were assigned for age, heart rate, WBC, BUN level, and bicarbonate level by drawing a line upward from the corresponding values to the “Score” line. The sum of all these scores, plotted on the “Total score” line, corresponds to predictions of 30-day survival probability in myocardial infarction patients. WBC, white blood cell count; bpm, beats per minute; BUN, blood urea nitrogen.

### **Figure 2. Performance evaluation of the nomogram in the primary and validation cohorts.**

Receiver operating characteristic curve analysis in the primary (A) and validation (B) cohorts. Calibration curve analysis in the primary (C) and validation (D) cohorts. The horizontal axis represents the nomogram-predicted probability of 30-day survival, and the vertical axis represents the actual observed 30-day mortality. Decision curve analysis for the primary (E) and validation (F) cohorts, implicating the net benefit with respect to the use of the nomogram. AUC, area under the curve; CI, confidence interval.

### **Figure 3 Survival curves classified by high-risk and low-risk group.**

Survival curves for two groups classified by prognostic total score calculated from the nomogram in the primary(A) and validation(B) cohort. For each survival curve, 95% confidence intervals and number at risk for each group were also presented.



**Table 1 Comparison of basic demographics, vital signs, laboratory tests, and 30-day mortality between the primary cohort and the validation cohort**

| Variables                 | Primary cohort<br>(n=1422) | Validation cohort<br>(n=609) | <i>P</i> |
|---------------------------|----------------------------|------------------------------|----------|
| <b>Basic demographics</b> |                            |                              |          |
| Age, years                | 67.6±14.2                  | 68.5±14.1                    | 0.195    |
| Male, n(%)                | 902 (63.4)                 | 397 (65.2)                   | 0.450    |
| Weight, kg                | 80.8 ± 19.9                | 80.7 ±19.0                   | 0.914    |
| CCU stay, n(%)            | 931 (65.5)                 | 390 (64.0)                   | 0.535    |
| Private insurance, n(%)   | 525 (36.92)                | 200 (32.84)                  | 0.079    |
| <b>Vital signs</b>        |                            |                              |          |
| Heart rate, bpm           | 84.8±17.9                  | 84.7±17.1                    | 0.910    |
| MAP, mmHg                 | 85.5±18.1                  | 85.3±17.4                    | 0.830    |
| Temperature, °C           | 36.3±0.9                   | 36.3±0.9                     | 0.619    |
| CVP (tested)              | 525 (36.9)                 | 228 (37.4)                   | 0.825    |
| <b>Laboratory tests</b>   |                            |                              |          |
| WBC, K/μL                 | 12.6±5.6                   | 12.7±5.5                     | 0.813    |
| Hemoglobin, g/dL          | 11.7±2.1                   | 11.6±2.1                     | 0.284    |
| Platelet, K/μL            | 227.8±94.0                 | 231.0±95.8                   | 0.474    |
| Creatinine, mg/dL         | 0.9(0.8-1.3)               | 1.0(0.8-1.4)                 | 0.295    |
| Creatinine kinase, U/L    | 338.0(67.0-988.6)          | 378.0(69.5-992.1)            | 0.510    |
| BNP (tested)              | 14 (1.0)                   | 5 (0.8)                      | 0.726    |
| BUN, mg/dL                | 18.0(13.8-27.0)            | 19.7(14.0-28.0)              | 0.165    |
| Bicarbonate, mg/dL        | 22.9±4.1                   | 23.1±3.9                     | 0.421    |
| pH (tested)               | 729(51.3)                  | 326(53.5)                    | 0.349    |
| pO <sub>2</sub> (tested)  | 719 (50.6)                 | 319 (52.4)                   | 0.453    |
| pCO <sub>2</sub> (tested) | 719 (50.6)                 | 319 (52.4)                   | 0.453    |
| Chloride, mg/dL           | 104.8±4.8                  | 104.5±5.2                    | 0.202    |
| Sodium, mg/dL             | 137.8±3.8                  | 137.7±3.9                    | 0.672    |
| Potassium, mg/dL          | 4.2±0.6                    | 4.2±0.7                      | 0.609    |
| Troponin (tested)         | 757(53.2)                  | 339(55.7)                    | 0.314    |
| Lactate (tested)          | 447 (31.4)                 | 212 (34.8)                   | 0.136    |
| 30-day mortality, n(%)    | 208 (14.6)                 | 95 (15.6)                    | 0.573    |

For each variable, the mean ± standard deviation, median (interquartile range) or frequency (percent) was reported as appropriate. For variables that had missing data for more than 20% of the patients in the current cohort, flags indicating whether these data were obtained were used as covariates. Continuous variables were compared using either Student's *t* test or the rank-sum test as appropriate. The chi-squared test was employed to compare the differences between categorical variables. CCU, cardiac care unit;

1  
2  
3  
4  
5  
6  
7  
8  
9  
10  
11  
12  
13  
14  
15  
16  
17  
18  
19  
20  
21  
22  
23  
24  
25  
26  
27  
28  
29  
30  
31  
32  
33  
34  
35  
36  
37  
38  
39  
40  
41  
42  
43  
44  
45  
46  
47  
48  
49  
50  
51  
52  
53  
54  
55  
56  
57  
58  
59  
60

MAP, mean arterial pressure; bpm, beats per minute; CVP, central venous pressure; WBC, white blood cell count; BNP, brain natriuretic peptide; BUN, blood urea nitrogen.

For peer review only

**Table 2 Univariate and multivariable analyses for the relationship between the candidate risk factors and 30-day mortality in the primary cohort**

| Variables         | Univariate model |             |          | Multivariable model |             |          |
|-------------------|------------------|-------------|----------|---------------------|-------------|----------|
|                   | HR               | 95% CI      | <i>P</i> | HR                  | 95% CI      | <i>P</i> |
| Age               | 1.042            | 1.031-1.053 | <0.001   | 1.033               | 1.022-1.045 | <0.001   |
| Male              | 0.549            | 0.418-0.721 | <0.001   | 0.763               | 0.574-1.015 | 0.063    |
| Weight            | 0.989            | 0.981-0.996 | 0.002    |                     |             |          |
| Private insurance | 0.353            | 0.249-0.502 | <0.001   |                     |             |          |
| Heart rate        | 1.022            | 1.015-1.029 | <0.001   | 1.016               | 1.008-1.023 | <0.001   |
| MAP               | 0.985            | 0.977-0.993 | <0.001   |                     |             |          |
| Hemoglobin        | 0.882            | 0.828-0.940 | <0.001   |                     |             |          |
| WBC               | 1.064            | 1.049-1.079 | <0.001   | 1.029               | 1.014-1.044 | <0.001   |
| BUN               | 1.025            | 1.021-1.030 | <0.001   | 1.014               | 1.008-1.020 | <0.001   |
| Bicarbonate       | 0.842            | 0.819-0.866 | <0.001   | 0.904               | 0.875-0.933 | <0.001   |
| Creatinine        | 1.257            | 1.181-1.338 | <0.001   |                     |             |          |
| Potassium         | 1.394            | 1.193-1.630 | <0.001   | 1.169               | 0.975-1.403 | 0.092    |

HRs were estimated by Cox proportional hazards regression. All statistical tests were two-sided. The selection of the final prediction model was performed with a backward stepwise selection process. HR, hazard ratio; CI, confidence interval; MAP, mean arterial pressure; WBC, white blood cell count; BUN, blood urea nitrogen.

1  
2  
3  
4  
5  
6  
7  
8  
9  
10  
11  
12  
13  
14  
15  
16  
17  
18  
19  
20  
21  
22  
23  
24  
25  
26  
27  
28  
29  
30  
31  
32  
33  
34  
35  
36  
37  
38  
39  
40  
41  
42  
43  
44  
45  
46  
47  
48  
49  
50  
51  
52  
53  
54  
55  
56  
57  
58  
59  
60

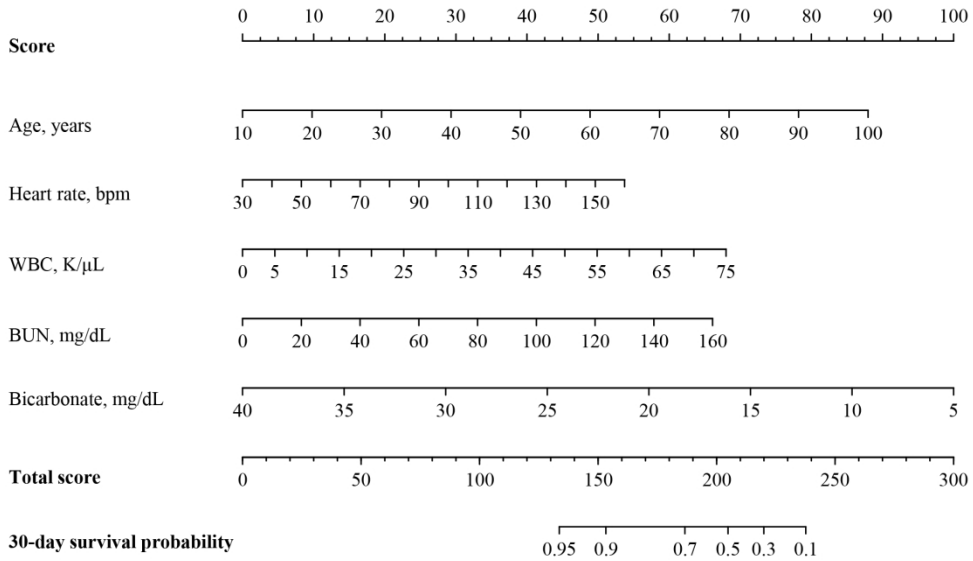

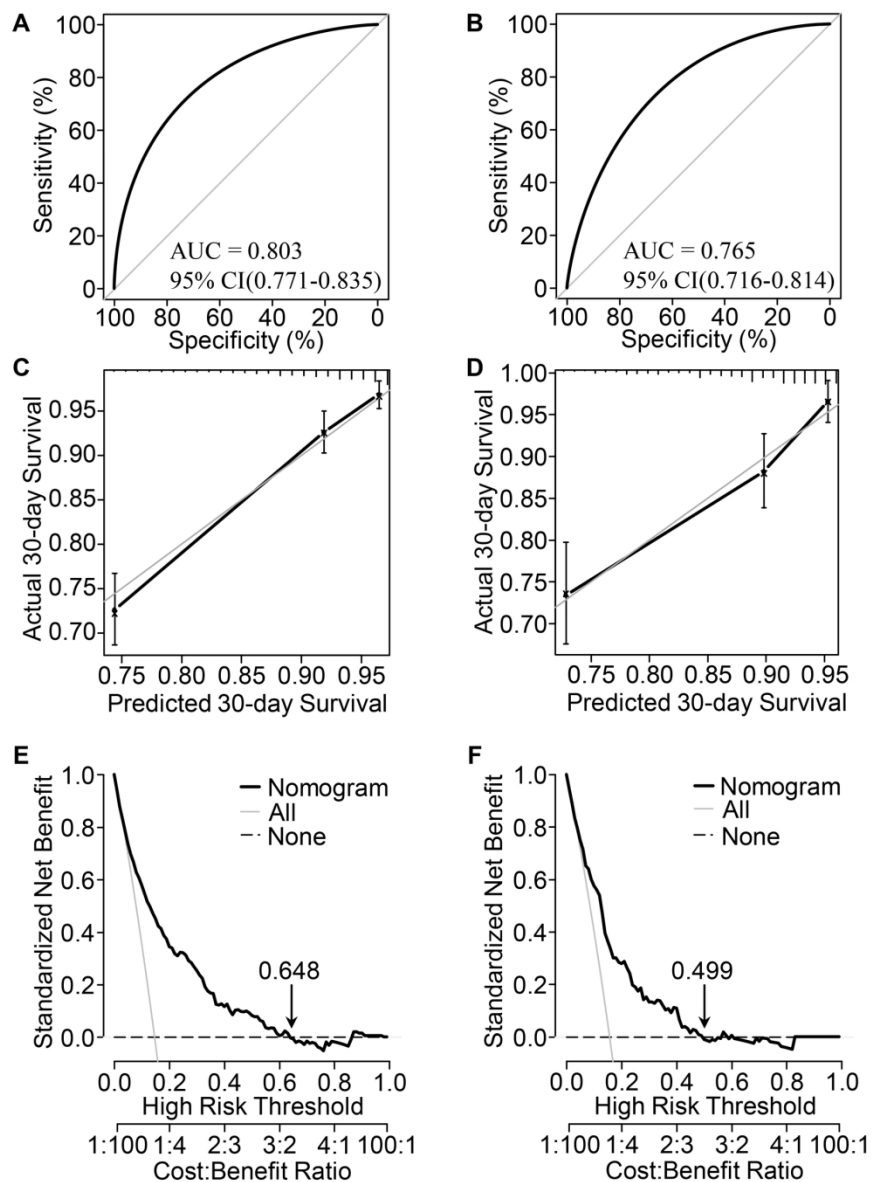

154x205mm (300 x 300 DPI)

1  
2  
3  
4  
5  
6  
7  
8  
9  
10  
11  
12  
13  
14  
15  
16  
17  
18  
19  
20  
21  
22  
23  
24  
25  
26  
27  
28  
29  
30  
31  
32  
33  
34  
35  
36  
37  
38  
39  
40  
41  
42  
43  
44  
45  
46  
47  
48  
49  
50  
51  
52  
53  
54  
55  
56  
57  
58  
59  
60

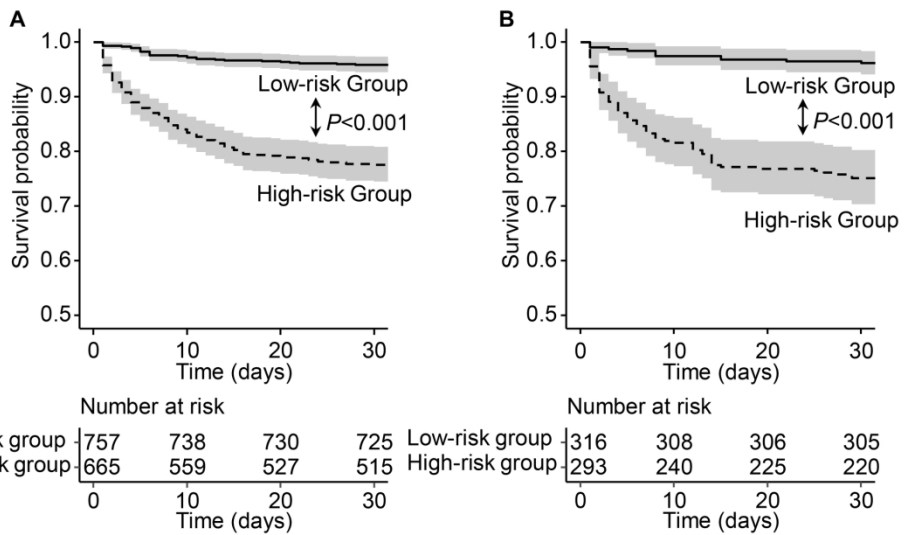

190x106mm (300 x 300 DPI)

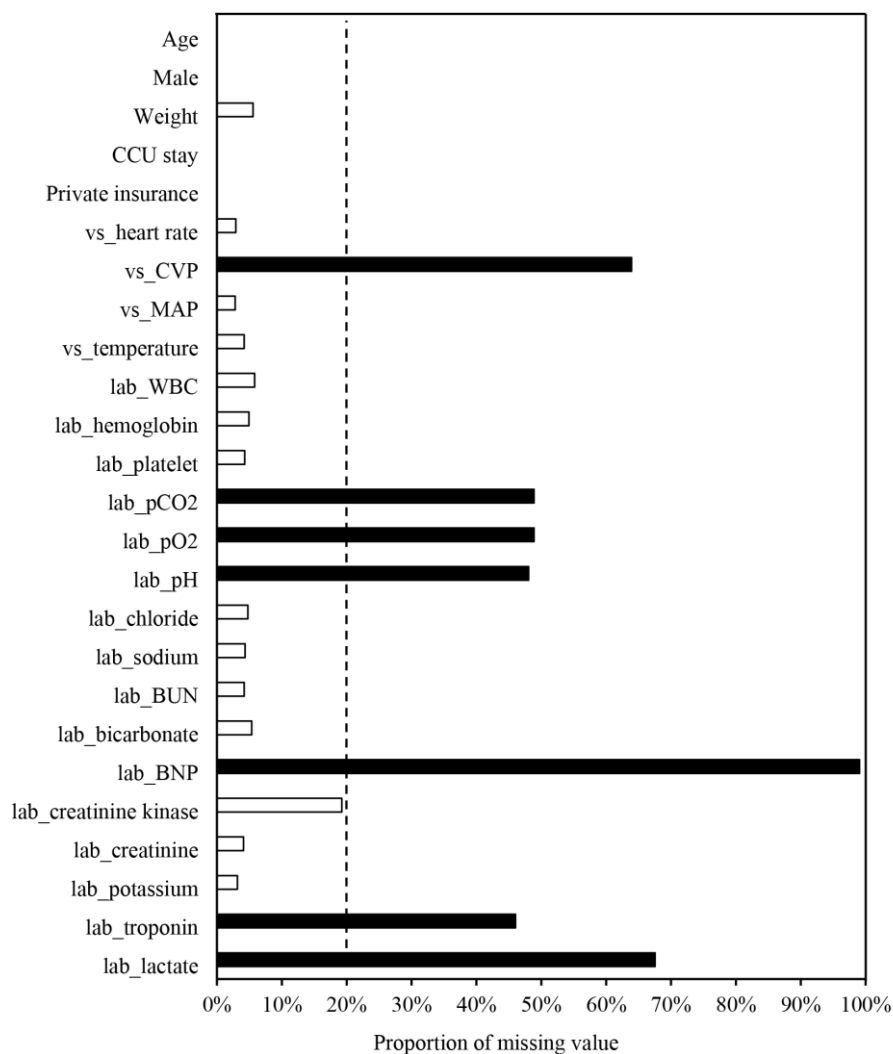

**Supplementary Figure 1. Summary of missing data.**

Black bars indicate variables with missing data for more than 20% of patients. CCU, cardiac care unit; MAP, mean arterial pressure; CVP, central venous pressure; WBC, white blood cell count; BNP, brain natriuretic peptide; BUN, blood urea nitrogen; vs, vital signs; lab, laboratory tests.

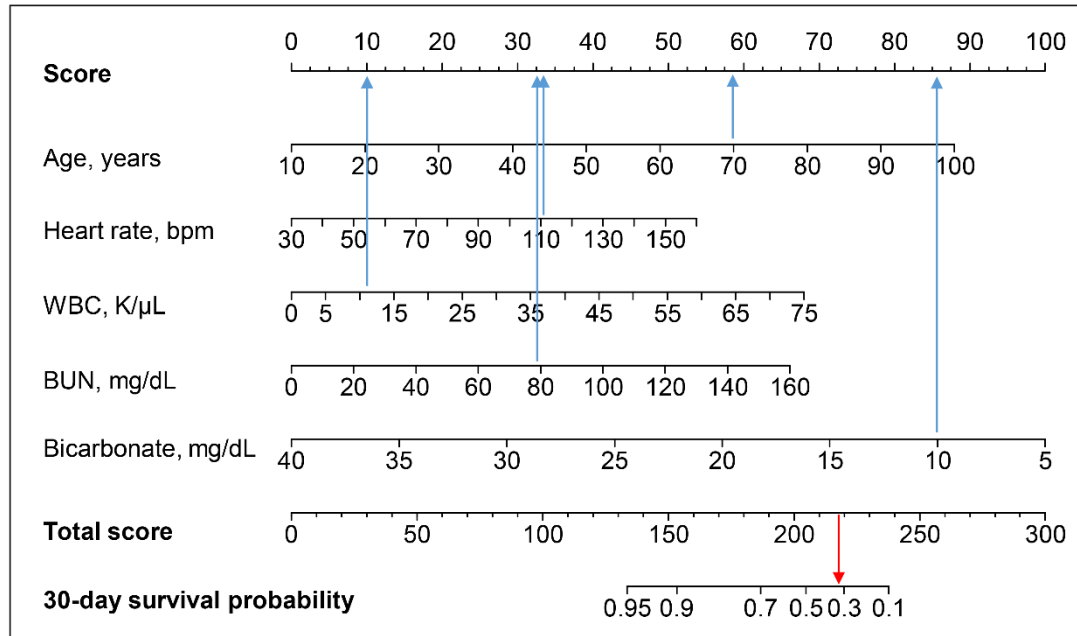

**Supplementary Figure 2. A high-risk sample predicted by nomogram model.**

Score was assigned for age, heart rate, WBC, BUN, and bicarbonate, by drawing a line upward from the corresponding values to the “Score” line. The sum of all these scores, plotted on the “Total score” line, corresponds to predictions of 30-day survival probability in myocardial infarction patients. WBC, white blood cell count; bpm, beats per minute; BUN, blood urea nitrogen.



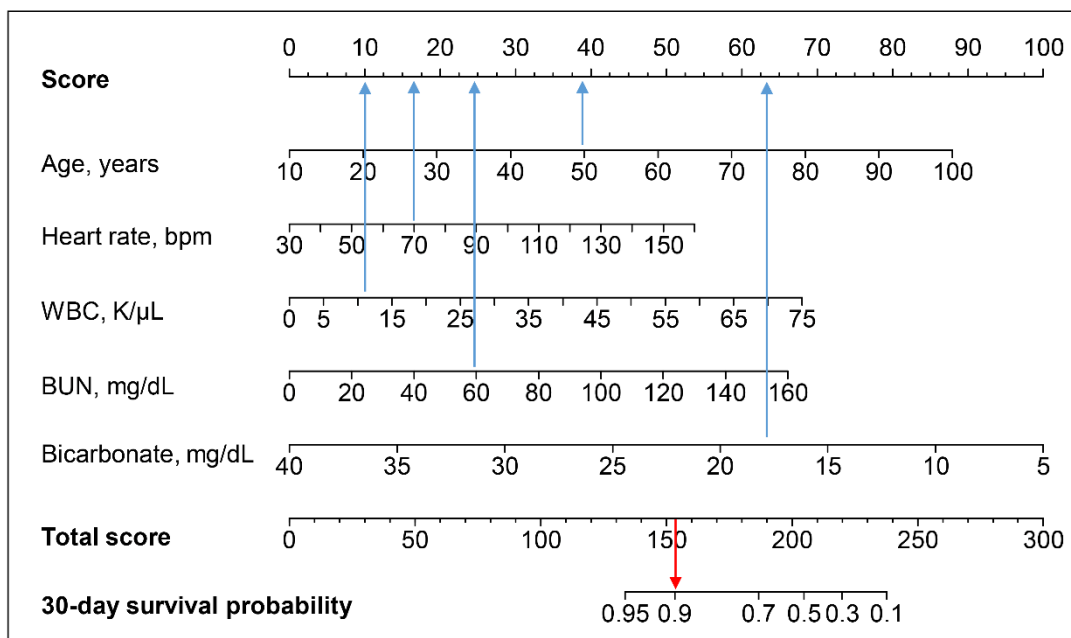

**Supplementary Figure 3. A low-risk sample predicted by nomogram model.**

Score was assigned for age, heart rate, WBC, BUN, and bicarbonate, by drawing a line upward from the corresponding values to the “Score” line. The sum of all these scores, plotted on the “Total score” line, corresponds to predictions of 30-day survival probability in myocardial infarction patients. WBC, white blood cell count; bpm, beats per minute; BUN, blood urea nitrogen.

**Supplementary Table 1. Univariate analyses for the relationship between the candidate risk factors and 30-day mortality in the primary cohort**

| Variables                 | HR    | 95% CI      | <i>P</i> for Cox model | <i>P</i> for proportional hazards assumption |
|---------------------------|-------|-------------|------------------------|----------------------------------------------|
| <b>Basic demographics</b> |       |             |                        |                                              |
| age                       | 1.042 | 1.031-1.053 | <0.001                 | 0.146                                        |
| male                      | 0.549 | 0.418-0.721 | <0.001                 | 0.902                                        |
| Weight                    | 0.989 | 0.981-0.996 | 0.002                  | 0.904                                        |
| CCU                       | 0.818 | 0.618-1.081 | 0.158                  | 0.915                                        |
| Private insurance         | 0.353 | 0.249-0.502 | <0.001                 | 0.155                                        |
| <b>Vital signs</b>        |       |             |                        |                                              |
| Heart rate                | 1.022 | 1.015-1.029 | <0.001                 | 0.004                                        |
| MAP                       | 0.985 | 0.977-0.993 | <0.001                 | 0.318                                        |
| Temperature               | 0.877 | 0.768-1.002 | 0.054                  | 0.612                                        |
| <b>Laboratory tests</b>   |       |             |                        |                                              |
| Hemoglobin                | 0.882 | 0.828-0.940 | <0.001                 | 0.764                                        |
| Platelet                  | 1.000 | 0.999-1.002 | 0.707                  | 0.325                                        |
| Creatinine kinase         | 1.000 | 1.000-1.000 | 0.518                  | 0.596                                        |
| WBC                       | 1.064 | 1.049-1.079 | <0.001                 | 0.728                                        |
| Chloride                  | 1.018 | 0.988-1.048 | 0.241                  | 0.458                                        |
| Sodium                    | 0.998 | 0.962-1.036 | 0.922                  | 0.615                                        |
| BUN                       | 1.025 | 1.021-1.030 | <0.001                 | 0.791                                        |
| Bicarbonate               | 0.842 | 0.819-0.866 | <0.001                 | 0.640                                        |
| Creatinine                | 1.257 | 1.181-1.338 | <0.001                 | 0.926                                        |
| Potassium                 | 1.394 | 1.193-1.630 | <0.001                 | 0.976                                        |

HRs were estimated by Cox proportional hazards regression. The proportional hazards assumption was checked based on the scaled Schoenfeld residuals. All statistical tests were two-sided. HR, hazard ratio; CI, confidence interval; CCU, cardiac care unit; MAP, mean arterial pressure; WBC, white blood cell count; BUN, blood urea nitrogen.

**Supplementary Table 2. Comparison among nomogram model and other existing models for 30-day mortality in MI patients**

| Author                          | Year | Model                                              | Disease                                                    | Number of subjects | Observed 30-day mortality, % | AUC  |
|---------------------------------|------|----------------------------------------------------|------------------------------------------------------------|--------------------|------------------------------|------|
| <i>Qi Guo et al</i>             | 2020 | Five-factor nomogram                               | MI                                                         | 2031               | 14.9                         | 0.80 |
| <i>Harlan M. Krumholz et al</i> | 2015 | Twenty-seven variables administrative claims model | Acute MI                                                   | 140120             | 18.0                         | 0.71 |
| <i>Sorin J. Brener et al</i>    | 2019 | Eight variables risk score                         | MI patients after percutaneous coronary intervention       | 24532              | 0.5                          | 0.85 |
| <i>Meng H. Hsieh et al</i>      | 2019 | Decision tree model                                | Acute MI patients after percutaneous coronary intervention | 3421               | 3.7                          | 0.90 |
| <i>Batric Popovic et al</i>     | 2016 | TIMI score                                         | ST elevation MI with left ventricular dysfunction          | 2486               | 2.4                          | 0.66 |
| <i>Roni Shouval et al</i>       | 2017 | GRACE score                                        | ST elevation MI                                            | 2482               | 4.5                          | 0.87 |

MI, myocardial infarction; AUC, the area under the receiver operating characteristic curve; TIMI, Thrombolysis in Myocardial Infarction; GRACE, Global Registry of Acute Coronary Events.

[1] Krumholz HM, Wang Y, Mattera JA, et al. An administrative claims model suitable for profiling hospital performance based on 30-day mortality rates among patients with an acute myocardial infarction. *Circulation*. 2006;113(13):1683-1692.

[2] Brener SJ, Leon MB, Serruys PW, et al. Derivation and external validation of a novel risk score for prediction of 30-day mortality after percutaneous coronary intervention. *EuroIntervention*. 2019;15(6):e551-e557.

[3] Hsieh MH, Lin SY, Lin CL, et al. A fitting machine learning prediction model for short-term mortality following percutaneous catheterization intervention: a nationwide population-based study. *Ann Transl Med*. 2019;7(23):732.

[4] Popovic B, Girerd N, Rossignol P, et al. Prognostic Value of the Thrombolysis in Myocardial Infarction Risk Score in ST-Elevation Myocardial Infarction Patients With Left Ventricular Dysfunction (from the EPHEBUS Trial). *Am J Cardiol*. 2016;118(10):1442-1447.

[5] Shouval R, Hadanny A, Shlomo N, et al. Machine learning for prediction of 30-day mortality after ST elevation myocardial infarction: An Acute Coronary Syndrome Israeli Survey data mining study. *Int J Cardiol*. 2017;246:7-13.

## TRIPOD Checklist: Prediction Model Development

| Section/Topic                | Item | Checklist Item                                                                                                                                                                                        | Page |
|------------------------------|------|-------------------------------------------------------------------------------------------------------------------------------------------------------------------------------------------------------|------|
| <b>Title and abstract</b>    |      |                                                                                                                                                                                                       |      |
| Title                        | 1    | Identify the study as developing and/or validating a multivariable prediction model, the target population, and the outcome to be predicted.                                                          | 1    |
| Abstract                     | 2    | Provide a summary of objectives, study design, setting, participants, sample size, predictors, outcome, statistical analysis, results, and conclusions.                                               | 2    |
| <b>Introduction</b>          |      |                                                                                                                                                                                                       |      |
| Background and objectives    | 3a   | Explain the medical context (including whether diagnostic or prognostic) and rationale for developing or validating the multivariable prediction model, including references to existing models.      | 4    |
|                              | 3b   | Specify the objectives, including whether the study describes the development or validation of the model or both.                                                                                     | 4    |
| <b>Methods</b>               |      |                                                                                                                                                                                                       |      |
| Source of data               | 4a   | Describe the study design or source of data (e.g., randomized trial, cohort, or registry data), separately for the development and validation data sets, if applicable.                               | 5    |
|                              | 4b   | Specify the key study dates, including start of accrual; end of accrual; and, if applicable, end of follow-up.                                                                                        | 5    |
| Participants                 | 5a   | Specify key elements of the study setting (e.g., primary care, secondary care, general population) including number and location of centres.                                                          | 5    |
|                              | 5b   | Describe eligibility criteria for participants.                                                                                                                                                       | 5    |
|                              | 5c   | Give details of treatments received, if relevant.                                                                                                                                                     | NA   |
| Outcome                      | 6a   | Clearly define the outcome that is predicted by the prediction model, including how and when assessed.                                                                                                | 6    |
|                              | 6b   | Report any actions to blind assessment of the outcome to be predicted.                                                                                                                                | NA   |
| Predictors                   | 7a   | Clearly define all predictors used in developing or validating the multivariable prediction model, including how and when they were measured.                                                         | 6    |
|                              | 7b   | Report any actions to blind assessment of predictors for the outcome and other predictors.                                                                                                            | NA   |
| Sample size                  | 8    | Explain how the study size was arrived at.                                                                                                                                                            | NA   |
| Missing data                 | 9    | Describe how missing data were handled (e.g., complete-case analysis, single imputation, multiple imputation) with details of any imputation method.                                                  | 6    |
| Statistical analysis methods | 10a  | Describe how predictors were handled in the analyses.                                                                                                                                                 | 7    |
|                              | 10b  | Specify type of model, all model-building procedures (including any predictor selection), and method for internal validation.                                                                         | 7    |
|                              | 10d  | Specify all measures used to assess model performance and, if relevant, to compare multiple models.                                                                                                   | 7    |
| Risk groups                  | 11   | Provide details on how risk groups were created, if done.                                                                                                                                             | 7    |
| <b>Results</b>               |      |                                                                                                                                                                                                       |      |
| Participants                 | 13a  | Describe the flow of participants through the study, including the number of participants with and without the outcome and, if applicable, a summary of the follow-up time. A diagram may be helpful. | 8    |
|                              | 13b  | Describe the characteristics of the participants (basic demographics, clinical features, available predictors), including the number of participants with missing data for predictors and outcome.    | 8    |
| Model development            | 14a  | Specify the number of participants and outcome events in each analysis.                                                                                                                               | 8    |
|                              | 14b  | If done, report the unadjusted association between each candidate predictor and outcome.                                                                                                              | 8    |
| Model specification          | 15a  | Present the full prediction model to allow predictions for individuals (i.e., all regression coefficients, and model intercept or baseline survival at a given time point).                           | 9    |
|                              | 15b  | Explain how to use the prediction model.                                                                                                                                                              | 9    |
| Model performance            | 16   | Report performance measures (with CIs) for the prediction model.                                                                                                                                      | 10   |
| <b>Discussion</b>            |      |                                                                                                                                                                                                       |      |
| Limitations                  | 18   | Discuss any limitations of the study (such as nonrepresentative sample, few events per predictor, missing data).                                                                                      | 12   |
| Interpretation               | 19b  | Give an overall interpretation of the results, considering objectives, limitations, and results from similar studies, and other relevant evidence.                                                    | 10   |
| Implications                 | 20   | Discuss the potential clinical use of the model and implications for future research.                                                                                                                 | 11   |
| <b>Other information</b>     |      |                                                                                                                                                                                                       |      |
| Supplementary information    | 21   | Provide information about the availability of supplementary resources, such as study protocol, Web calculator, and data sets.                                                                         | 6    |
| Funding                      | 22   | Give the source of funding and the role of the funders for the present study.                                                                                                                         | 14   |

We recommend using the TRIPOD Checklist in conjunction with the TRIPOD Explanation and Elaboration document.
