# Supplementary material for: Development and validation of a prognostic nomogram for myocardial infarction patients in intensive care units: a retrospective cohort study
Source: PubMed Central journal article supplement — BMJ Open. 2020 Dec 17;10(12):e040291. doi: 10.1136/bmjopen-2020-040291 (PMC7747593; doi:10.1136/bmjopen-2020-040291), 2020-12-17
Supplement: bmjopen-2020-040291supp001.pdf [file bmjopen-2020-040291supp001.pdf]

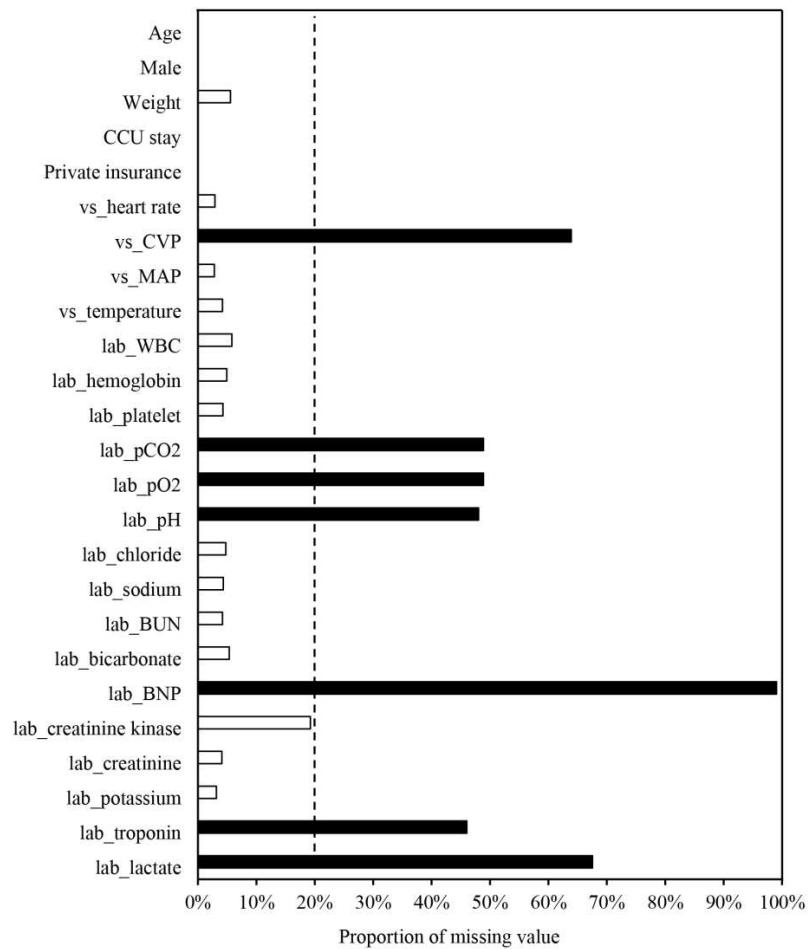

**Supplementary Figure 1. Summary of missing data.**

Black bars indicate variables with missing data for more than 20% of patients. CCU, cardiac care unit; MAP, mean arterial pressure; CVP, central venous pressure; WBC, white blood cell count; BNP, brain natriuretic peptide; BUN, blood urea nitrogen; vs, vital signs; lab, laboratory tests.

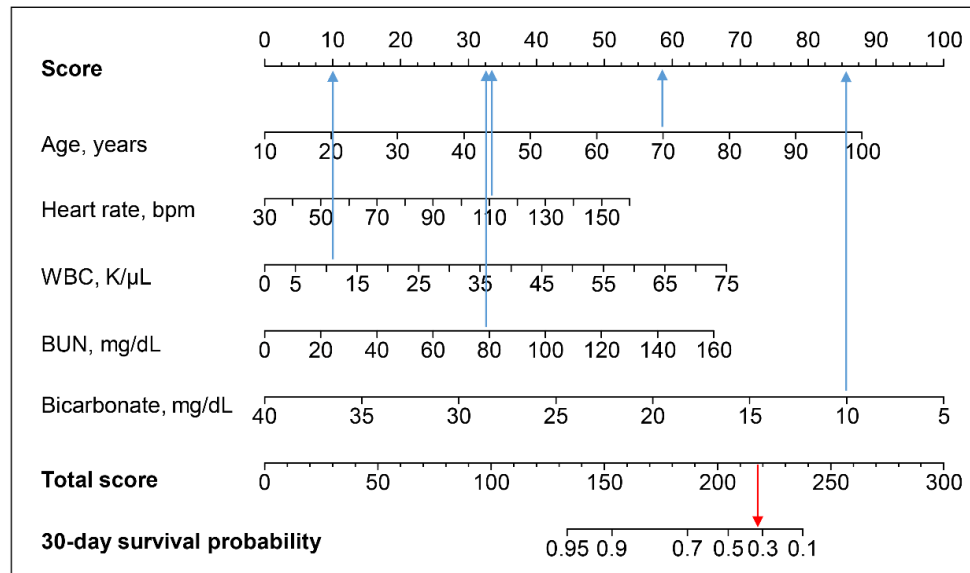

**Supplementary Figure 2. A high-risk sample predicted by nomogram model.**

Score was assigned for age, heart rate, WBC, BUN, and bicarbonate, by drawing a line upward from the corresponding values to the “Score” line. The sum of all these scores, plotted on the “Total score” line, corresponds to predictions of 30-day survival probability in myocardial infarction patients. WBC, white blood cell count; bpm, beats per minute; BUN, blood urea nitrogen.

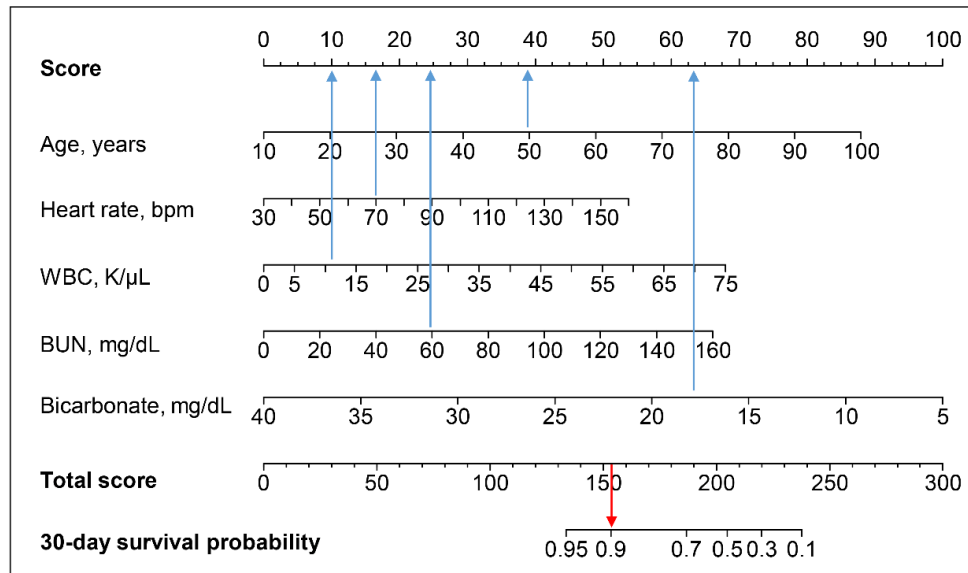

**Supplementary Figure 3. A low-risk sample predicted by nomogram model.**

Score was assigned for age, heart rate, WBC, BUN, and bicarbonate, by drawing a line upward from the corresponding values to the “Score” line. The sum of all these scores, plotted on the “Total score” line, corresponds to predictions of 30-day survival probability in myocardial infarction patients. WBC, white blood cell count; bpm, beats per minute; BUN, blood urea nitrogen.

**Supplementary Table 1. Univariate analyses for the relationship between the candidate risk factors and 30-day mortality in the primary cohort**

| Variables                 | HR    | 95% CI      | <i>P</i> for Cox model | <i>P</i> for proportional hazards assumption |
|---------------------------|-------|-------------|------------------------|----------------------------------------------|
| <b>Basic demographics</b> |       |             |                        |                                              |
| age                       | 1.042 | 1.031-1.053 | <0.001                 | 0.146                                        |
| male                      | 0.549 | 0.418-0.721 | <0.001                 | 0.902                                        |
| Weight                    | 0.989 | 0.981-0.996 | 0.002                  | 0.904                                        |
| CCU                       | 0.818 | 0.618-1.081 | 0.158                  | 0.915                                        |
| Private insurance         | 0.353 | 0.249-0.502 | <0.001                 | 0.155                                        |
| <b>Vital signs</b>        |       |             |                        |                                              |
| Heart rate                | 1.022 | 1.015-1.029 | <0.001                 | 0.004                                        |
| MAP                       | 0.985 | 0.977-0.993 | <0.001                 | 0.318                                        |
| Temperature               | 0.877 | 0.768-1.002 | 0.054                  | 0.612                                        |
| <b>Laboratory tests</b>   |       |             |                        |                                              |
| Hemoglobin                | 0.882 | 0.828-0.940 | <0.001                 | 0.764                                        |
| Platelet                  | 1.000 | 0.999-1.002 | 0.707                  | 0.325                                        |
| Creatinine kinase         | 1.000 | 1.000-1.000 | 0.518                  | 0.596                                        |
| WBC                       | 1.064 | 1.049-1.079 | <0.001                 | 0.728                                        |
| Chloride                  | 1.018 | 0.988-1.048 | 0.241                  | 0.458                                        |
| Sodium                    | 0.998 | 0.962-1.036 | 0.922                  | 0.615                                        |
| BUN                       | 1.025 | 1.021-1.030 | <0.001                 | 0.791                                        |
| Bicarbonate               | 0.842 | 0.819-0.866 | <0.001                 | 0.640                                        |
| Creatinine                | 1.257 | 1.181-1.338 | <0.001                 | 0.926                                        |
| Potassium                 | 1.394 | 1.193-1.630 | <0.001                 | 0.976                                        |

HRs were estimated by Cox proportional hazards regression. The proportional hazards assumption was checked based on the scaled Schoenfeld residuals. All statistical tests were two-sided. HR, hazard ratio; CI, confidence interval; CCU, cardiac care unit; MAP, mean arterial pressure; WBC, white blood cell count; BUN, blood urea nitrogen.

**Supplementary Table 2. Comparison among nomogram model and other existing models for 30-day mortality in MI patients**

| Author                          | Year | Model                                              | Disease                                                    | Number of subjects | Observed 30-day mortality, % | AUC  |
|---------------------------------|------|----------------------------------------------------|------------------------------------------------------------|--------------------|------------------------------|------|
| <i>Qi Guo et al</i>             | 2020 | Five-factor nomogram                               | MI                                                         | 2031               | 14.9                         | 0.80 |
| <i>Harlan M. Krumholz et al</i> | 2015 | Twenty-seven variables administrative claims model | Acute MI                                                   | 140120             | 18.0                         | 0.71 |
| <i>Sorin J. Brener et al</i>    | 2019 | Eight variables risk score                         | MI patients after percutaneous coronary intervention       | 24532              | 0.5                          | 0.85 |
| <i>Meng H. Hsieh et al</i>      | 2019 | Decision tree model                                | Acute MI patients after percutaneous coronary intervention | 3421               | 3.7                          | 0.90 |
| <i>Batric Popovic et al</i>     | 2016 | TIMI score                                         | ST elevation MI with left ventricular dysfunction          | 2486               | 2.4                          | 0.66 |
| <i>Roni Shouval et al</i>       | 2017 | GRACE score                                        | ST elevation MI                                            | 2482               | 4.5                          | 0.87 |

MI, myocardial infarction; AUC, the area under the receiver operating characteristic curve; TIMI, Thrombolysis in Myocardial Infarction; GRACE, Global Registry of Acute Coronary Events.

- [1] Krumholz HM, Wang Y, Mattera JA, et al. An administrative claims model suitable for profiling hospital performance based on 30-day mortality rates among patients with an acute myocardial infarction. *Circulation*. 2006;113(13):1683-1692.
- [2] Brener SJ, Leon MB, Serruys PW, et al. Derivation and external validation of a novel risk score for prediction of 30-day mortality after percutaneous coronary intervention. *EuroIntervention*. 2019;15(6):e551-e557.
- [3] Hsieh MH, Lin SY, Lin CL, et al. A fitting machine learning prediction model for short-term mortality following percutaneous catheterization intervention: a nationwide population-based study. *Ann Transl Med*. 2019;7(23):732.
- [4] Popovic B, Girerd N, Rossignol P, et al. Prognostic Value of the Thrombolysis in Myocardial Infarction Risk Score in ST-Elevation Myocardial Infarction Patients With Left Ventricular Dysfunction (from the EPHEBUS Trial). *Am J Cardiol*. 2016;118(10):1442-1447.
- [5] Shouval R, Hadanny A, Shlomo N, et al. Machine learning for prediction of 30-day mortality after ST elevation myocardial infarction: An Acute Coronary Syndrome Israeli Survey data mining study. *Int J Cardiol*. 2017;246:7-13.
